# Supplementary material for: Low Temperature Inhibits the Defoliation Efficiency of Thidiazuron in Cotton by Regulating Plant Hormone Synthesis and the Signaling Pathway
Source: Int J Mol Sci. 2022 Nov 17;23(22):14208. doi: 10.3390/ijms232214208 (PMC9694417; doi:10.3390/ijms232214208)
Supplement: Supplementary file 1 [file ijms-23-14208-s001.zip]

Archive with 10 entries (10 files):
- Figure S1.pdf
- Table S1. An overview of the RNA-sequencing results.xlsx
- Table S2 Plant signaling genes in AZ induced by TDZ.xlsx
- Table S3 KEGG pathway of DEGs in AZ.xlsx
- Table S4 The down-regulated auxin signaling genes induced by TDZ.xlsx
- Table S5 The up-regulated  ethylene signaling genes induced by TDZ.xlsx
- Table S6 The CTK signaling genes induced by TDZ.xlsx
- Table S7 The ABA signaling genes induced by TDZ.xlsx
- Table S8 The up-regulated cell wall hydrolase genes induced by TDZ.xlsx
- Table S9 List of primers used in this study.xlsx
