# Supplementary material for: Low Temperature Inhibits the Defoliation Efficiency of Thidiazuron in Cotton by Regulating Plant Hormone Synthesis and the Signaling Pathway
Source: Int J Mol Sci. 2022 Nov 17;23(22):14208. doi: 10.3390/ijms232214208 (PMC9694417; doi:10.3390/ijms232214208)
Supplement: Supplementary file 1 [file ijms-23-14208-s001.zip › Table S1. An overview of the RNA-sequencing results.xlsx]

## Sheet: Supplementary Table S1
Table S1. An overview of the RNA-sequencing results
Sample	Clean reads	Clean bases	Q30	Mapping rate	Unique_map
		(G)	(%)	(%)	(%)
Control N-24 h	45074264	6.76	91.42	94.34	86.94
TDZ N-24 h	40885776	6.13	91.47	93.46	85.74
Control L-24 h	45210876	6.78	91.79	95.99	88.13
TDZ L-24 h	42072950	6.31	91.66	95.39	87.36
Control L-144 h	40499720	6.07	91.27	93.56	85.6
TDZ L-144 h	40531012	6.08	91.54	95.44	87.66
Note: Clean reads: Paired-end numbers of Clean Data; Clean bases: total base number of Clean Data; Q30: base which quality value is greater than or equal to 30 percentage of Clean Data; Unique_map: reads number mapped uniquely mapped to the reference genome and the percentage in Clean Reads.
