# Supplementary material for: Low Temperature Inhibits the Defoliation Efficiency of Thidiazuron in Cotton by Regulating Plant Hormone Synthesis and the Signaling Pathway
Source: Int J Mol Sci. 2022 Nov 17;23(22):14208. doi: 10.3390/ijms232214208 (PMC9694417; doi:10.3390/ijms232214208)
Supplement: Supplementary file 1 [file ijms-23-14208-s001.zip › Table S2 Plant signaling genes in AZ induced by TDZ.xlsx]

## Sheet: Sheet1
	Table S2. Plant signaling genes in AZ induced by TDZ
	Numbers	Gene name	NR:Description	Pfam:Description	KEGG:Description
Up-regulated DEGs	1	Gh_A01G1655	PREDICTED: transcription factor TGA2-like isoform X1 [Gossypium raimondii]	Seed dormancy control. This family of plant proteins appears to be a highly specific controller seed dormancy.	.
	2	Gh_D04G1627	PREDICTED: auxin-induced protein X15-like [Gossypium raimondii]	Auxin responsive protein. This family consists of the protein products of the ARG7 auxin responsive genes family none of which have any identified functional role.	.
	3	Gh_A09G1184	PREDICTED: transcription factor TGA2 isoform X1 [Gossypium raimondii]	Seed dormancy control. This family of plant proteins appears to be a highly specific controller seed dormancy.	.
	4	Gh_A13G0579	PREDICTED: BRASSINOSTEROID INSENSITIVE 1-associated receptor kinase 1-like [Gossypium raimondii]	Leucine rich repeat N-terminal domain. Leucine Rich Repeats pfam00560 are short sequence motifs present in a number of proteins with diverse functions and cellular locations. Leucine Rich Repeats are often flanked by cysteine rich domains. This domain is often found at the N-terminus of tandem leucine rich repeats.	.
	5	Gh_A11G2783	PREDICTED: TGACG-sequence-specific DNA-binding protein TGA-2.1-like [Gossypium raimondii]	Seed dormancy control. This family of plant proteins appears to be a highly specific controller seed dormancy.	.
	6	Gh_D08G1114	hypothetical protein B456_004G123800, partial [Gossypium raimondii]	Auxin responsive protein. This family consists of the protein products of the ARG7 auxin responsive genes family none of which have any identified functional role.	.
	7	Gh_D09G0928	PREDICTED: transcription factor TGA2-like [Gossypium raimondii]	Seed dormancy control. This family of plant proteins appears to be a highly specific controller seed dormancy.	.
	8	Gh_D02G1987	PREDICTED: BRASSINOSTEROID INSENSITIVE 1-associated receptor kinase 1 [Gossypium raimondii]	Protein kinase domain.	.
	9	Gh_D13G0548	PREDICTED: BRASSINOSTEROID INSENSITIVE 1-associated receptor kinase 1-like [Gossypium raimondii]	Leucine rich repeat N-terminal domain. Leucine Rich Repeats pfam00560 are short sequence motifs present in a number of proteins with diverse functions and cellular locations. Leucine Rich Repeats are often flanked by cysteine rich domains. This domain is often found at the N-terminus of tandem leucine rich repeats.	.
	10	Gh_D01G1903	PREDICTED: transcription factor TGA2-like isoform X1 [Gossypium raimondii]	Seed dormancy control. This family of plant proteins appears to be a highly specific controller seed dormancy.	.
	11	Gh_A03G2162	somatic embryogenesis receptor-like kinase 3 protein [Gossypium hirsutum]	Protein kinase domain.	.
	12	Gh_A03G2095	abscisic acid-insensitive 5-like protein 5 [Gossypium arboreum]	bZIP transcription factor. The Pfam entry includes the basic region and the leucine zipper region.	.
	13	Gh_Sca006599G01	abscisic acid-insensitive 5 -like protein [Gossypium arboreum]	bZIP transcription factor. The Pfam entry includes the basic region and the leucine zipper region.	ABF; ABA responsive element binding factor
	14	Gh_A12G0049	PREDICTED: histidine-containing phosphotransfer protein 5 isoform X1 [Gossypium raimondii]	Hpt domain. The histidine-containing phosphotransfer (HPt) domain is a novel protein module with an active histidine residue that mediates phosphotransfer reactions in the two-component signaling systems. A multistep phosphorelay involving the HPt domain has been suggested for these signaling pathways. The crystal structure of the HPt domain of the anaerobic sensor kinase ArcB has been determined…	AHP; histidine-containing phosphotransfer peotein
	15	Gh_A09G1290	Histidine-containing phosphotransfer 1 [Gossypium arboreum]	Hpt domain. The histidine-containing phosphotransfer (HPt) domain is a novel protein module with an active histidine residue that mediates phosphotransfer reactions in the two-component signaling systems. A multistep phosphorelay involving the HPt domain has been suggested for these signaling pathways. The crystal structure of the HPt domain of the anaerobic sensor kinase ArcB has been determined…	AHP; histidine-containing phosphotransfer peotein
	16	Gh_A10G0939	Histidine-containing phosphotransfer 1 -like protein [Gossypium arboreum]	Hpt domain. The histidine-containing phosphotransfer (HPt) domain is a novel protein module with an active histidine residue that mediates phosphotransfer reactions in the two-component signaling systems. A multistep phosphorelay involving the HPt domain has been suggested for these signaling pathways. The crystal structure of the HPt domain of the anaerobic sensor kinase ArcB has been determined…	AHP; histidine-containing phosphotransfer peotein
	17	Gh_D11G1243	PREDICTED: histidine-containing phosphotransfer protein 5-like [Gossypium raimondii]	Hpt domain. The histidine-containing phosphotransfer (HPt) domain is a novel protein module with an active histidine residue that mediates phosphotransfer reactions in the two-component signaling systems. A multistep phosphorelay involving the HPt domain has been suggested for these signaling pathways. The crystal structure of the HPt domain of the anaerobic sensor kinase ArcB has been determined…	AHP; histidine-containing phosphotransfer peotein
	18	Gh_A05G2389	PREDICTED: two-component response regulator ARR17-like [Gossypium raimondii]	Response regulator receiver domain. This domain receives the signal from the sensor partner in bacterial two-component systems. It is usually found N-terminal to a DNA binding effector domain.	ARR-A; two-component response regulator ARR-A family
	19	Gh_A10G1654	PREDICTED: two-component response regulator ARR9-like [Gossypium raimondii]	Response regulator receiver domain. This domain receives the signal from the sensor partner in bacterial two-component systems. It is usually found N-terminal to a DNA binding effector domain.	ARR-A; two-component response regulator ARR-A family
	20	Gh_A05G3475	PREDICTED: two-component response regulator ARR8-like [Gossypium raimondii]	Response regulator receiver domain. This domain receives the signal from the sensor partner in bacterial two-component systems. It is usually found N-terminal to a DNA binding effector domain.	ARR-A; two-component response regulator ARR-A family
	21	Gh_D04G1933	PREDICTED: two-component response regulator ARR8-like [Gossypium raimondii]	Response regulator receiver domain. This domain receives the signal from the sensor partner in bacterial two-component systems. It is usually found N-terminal to a DNA binding effector domain.	ARR-A; two-component response regulator ARR-A family
	22	Gh_D04G1347	hypothetical protein B456_012G123500 [Gossypium raimondii]	Response regulator receiver domain. This domain receives the signal from the sensor partner in bacterial two-component systems. It is usually found N-terminal to a DNA binding effector domain.	ARR-A; two-component response regulator ARR-A family
	23	Gh_D09G1609	PREDICTED: two-component response regulator ARR6 [Gossypium raimondii]	Response regulator receiver domain. This domain receives the signal from the sensor partner in bacterial two-component systems. It is usually found N-terminal to a DNA binding effector domain.	ARR-A; two-component response regulator ARR-A family
	24	Gh_D05G2240	hypothetical protein B456_009G246600 [Gossypium raimondii]	Response regulator receiver domain. This domain receives the signal from the sensor partner in bacterial two-component systems. It is usually found N-terminal to a DNA binding effector domain.	ARR-A; two-component response regulator ARR-A family
	25	Gh_D10G1909	PREDICTED: two-component response regulator ARR9-like [Gossypium raimondii]	Response regulator receiver domain. This domain receives the signal from the sensor partner in bacterial two-component systems. It is usually found N-terminal to a DNA binding effector domain.	ARR-A; two-component response regulator ARR-A family
	26	Gh_A13G0029	PREDICTED: two-component response regulator ARR8 [Gossypium raimondii]	Response regulator receiver domain. This domain receives the signal from the sensor partner in bacterial two-component systems. It is usually found N-terminal to a DNA binding effector domain.	ARR-A; two-component response regulator ARR-A family
	27	Gh_A05G3723	hypothetical protein B456_009G246600 [Gossypium raimondii]	Response regulator receiver domain. This domain receives the signal from the sensor partner in bacterial two-component systems. It is usually found N-terminal to a DNA binding effector domain.	ARR-A; two-component response regulator ARR-A family
	28	Gh_D13G0044	PREDICTED: two-component response regulator ARR8 [Gossypium raimondii]	Response regulator receiver domain. This domain receives the signal from the sensor partner in bacterial two-component systems. It is usually found N-terminal to a DNA binding effector domain.	ARR-A; two-component response regulator ARR-A family
	29	Gh_D05G2656	PREDICTED: two-component response regulator ARR17-like [Gossypium raimondii]	Response regulator receiver domain. This domain receives the signal from the sensor partner in bacterial two-component systems. It is usually found N-terminal to a DNA binding effector domain.	ARR-A; two-component response regulator ARR-A family
	30	Gh_D11G1176	PREDICTED: two-component response regulator ARR1-like isoform X1 [Gossypium raimondii]	Response regulator receiver domain. This domain receives the signal from the sensor partner in bacterial two-component systems. It is usually found N-terminal to a DNA binding effector domain.	ARR-B; two-component response regulator ARR-B family
	31	Gh_A07G0197	Two-component response regulator ARR12 -like protein [Gossypium arboreum]	Response regulator receiver domain. This domain receives the signal from the sensor partner in bacterial two-component systems. It is usually found N-terminal to a DNA binding effector domain.	ARR-B; two-component response regulator ARR-B family
	32	Gh_Sca005214G02	PREDICTED: two-component response regulator ARR2-like [Gossypium raimondii]	Response regulator receiver domain. This domain receives the signal from the sensor partner in bacterial two-component systems. It is usually found N-terminal to a DNA binding effector domain.	ARR-B; two-component response regulator ARR-B family
	33	Gh_D07G0251	PREDICTED: two-component response regulator ARR12-like [Gossypium raimondii]	Response regulator receiver domain. This domain receives the signal from the sensor partner in bacterial two-component systems. It is usually found N-terminal to a DNA binding effector domain.	ARR-B; two-component response regulator ARR-B family
	34	Gh_A01G0686	Receptor like protein 53, putative [Theobroma cacao]	Leucine rich repeat.	BRI1; protein brassinosteroid insensitive 1 [EC:2.7.10.1 2.7.11.1]
	35	Gh_D12G0358	PREDICTED: probable serine/threonine-protein kinase At4g35230 [Gossypium raimondii]	Protein kinase domain.	BSK; BR-signaling kinase [EC:2.7.11.1]
	36	Gh_D06G0459	PREDICTED: uncharacterized protein LOC105773754 isoform X1 [Gossypium raimondii]	Protein tyrosine kinase.	CTR1; serine/threonine-protein kinase CTR1 [EC:2.7.11.1]
	37	Gh_D07G0364	PREDICTED: EIN3-binding F-box protein 1-like [Gossypium raimondii]	F-box domain. This domain is approximately 50 amino acids long, and is usually found in the N-terminal half of a variety of proteins. Two motifs that are commonly found associated with the F-box domain are the leucine rich repeats (LRRs; pfam00560 and pfam07723) and the WD repeat (pfam00400). The F-box domain has a role in mediating protein-protein interactions in a variety of contexts, such as p…	EBF1_2; EIN3-binding F-box protein
	38	Gh_D07G0280	PREDICTED: EIN3-binding F-box protein 1 [Gossypium raimondii]	F-box-like. This is an F-box-like family.	EBF1_2; EIN3-binding F-box protein
	39	Gh_A05G0085	EIN3-binding F-box 1 -like protein [Gossypium arboreum]	F-box domain. This domain is approximately 50 amino acids long, and is usually found in the N-terminal half of a variety of proteins. Two motifs that are commonly found associated with the F-box domain are the leucine rich repeats (LRRs; pfam00560 and pfam07723) and the WD repeat (pfam00400). The F-box domain has a role in mediating protein-protein interactions in a variety of contexts, such as p…	EBF1_2; EIN3-binding F-box protein
	40	Gh_A07G0307	EIN3-binding F-box 1 -like protein [Gossypium arboreum]	F-box domain. This domain is approximately 50 amino acids long, and is usually found in the N-terminal half of a variety of proteins. Two motifs that are commonly found associated with the F-box domain are the leucine rich repeats (LRRs; pfam00560 and pfam07723) and the WD repeat (pfam00400). The F-box domain has a role in mediating protein-protein interactions in a variety of contexts, such as p…	EBF1_2; EIN3-binding F-box protein
	41	Gh_D06G1178	PREDICTED: ETHYLENE INSENSITIVE 3-like 3 protein isoform X1 [Gossypium raimondii]	Ethylene insensitive 3. Ethylene insensitive 3 (EIN3) proteins are a family of plant DNA-binding proteins that regulate transcription in response to the gaseous plant hormone ethylene, and are essential for ethylene-mediated responses including the triple response, cell growth inhibition, and accelerated senescence.	EIN3; ethylene-insensitive protein 3
	42	Gh_D02G0430	PREDICTED: ethylene-responsive transcription factor 1B [Gossypium raimondii]	AP2 domain. This 60 amino acid residue domain can bind to DNA and is found in transcription factor proteins.	ERF1; ethylene-responsive transcription factor 1
	43	Gh_A02G0377	PREDICTED: ethylene-responsive transcription factor 1B [Gossypium raimondii]	Protein of unknown function (DUF3296). This family is expressed in Gammaproteobacteria. One of the E coli members is annotated as yagK, but otherwise the function is not known.	ERF1; ethylene-responsive transcription factor 1
	44	Gh_D07G1488	PREDICTED: ethylene-responsive transcription factor 1B-like [Gossypium raimondii]	AP2 domain. This 60 amino acid residue domain can bind to DNA and is found in transcription factor proteins.	ERF1; ethylene-responsive transcription factor 1
	45	Gh_D10G1537	PREDICTED: ethylene-responsive transcription factor 1B-like [Gossypium raimondii]	AP2 domain. This 60 amino acid residue domain can bind to DNA and is found in transcription factor proteins.	ERF1; ethylene-responsive transcription factor 1
	46	Gh_A08G0417	hypothetical protein B456_004G057100 [Gossypium raimondii]	Intracellular growth attenuator protein IgaA. This family consists of several bacterial intracellular growth attenuator (IgaA) proteins. IgaA is involved in negative control of bacterial proliferation within fibroblasts. IgaA is homologous to the Escherichia coli YrfF and P. mirabilis UmoB proteins. Whereas the biological function of YrfF is currently unknown, UmoB has been shown elsewhere to act…	ERF1; ethylene-responsive transcription factor 1
	47	Gh_D11G2588	PREDICTED: ethylene-responsive transcription factor 1B-like [Gossypium raimondii]	AP2 domain. This 60 amino acid residue domain can bind to DNA and is found in transcription factor proteins.	ERF1; ethylene-responsive transcription factor 1
	48	Gh_D08G2044	PREDICTED: ethylene-responsive transcription factor 15-like [Gossypium raimondii]	AP2 domain. This 60 amino acid residue domain can bind to DNA and is found in transcription factor proteins.	ERF1; ethylene-responsive transcription factor 1
	49	Gh_D13G1806	PREDICTED: ethylene-responsive transcription factor 1B-like [Gossypium raimondii]	AP2 domain. This 60 amino acid residue domain can bind to DNA and is found in transcription factor proteins.	ERF1; ethylene-responsive transcription factor 1
	50	Gh_D13G1807	PREDICTED: ethylene-responsive transcription factor 1B-like [Gossypium raimondii]	AP2 domain. This 60 amino acid residue domain can bind to DNA and is found in transcription factor proteins.	ERF1; ethylene-responsive transcription factor 1
	51	Gh_A13G1480	PREDICTED: ethylene-responsive transcription factor 1B-like [Gossypium raimondii]	AP2 domain. This 60 amino acid residue domain can bind to DNA and is found in transcription factor proteins.	ERF1; ethylene-responsive transcription factor 1
	52	Gh_Sca115107G01	PREDICTED: ethylene-responsive transcription factor 1B [Gossypium raimondii]	AP2 domain. This 60 amino acid residue domain can bind to DNA and is found in transcription factor proteins.	ERF1; ethylene-responsive transcription factor 1
	53	Gh_A10G1008	PREDICTED: ethylene-responsive transcription factor 1B-like [Gossypium raimondii]	AP2 domain. This 60 amino acid residue domain can bind to DNA and is found in transcription factor proteins.	ERF1; ethylene-responsive transcription factor 1
	54	Gh_A07G1936	PREDICTED: ethylene-responsive transcription factor 1B-like [Gossypium raimondii]	AP2 domain. This 60 amino acid residue domain can bind to DNA and is found in transcription factor proteins.	ERF1; ethylene-responsive transcription factor 1
	55	Gh_D07G2491	PREDICTED: ethylene-responsive transcription factor ERF096-like [Gossypium raimondii]	AP2 domain. This 60 amino acid residue domain can bind to DNA and is found in transcription factor proteins.	ERF1; ethylene-responsive transcription factor 1
	56	Gh_A11G2280	PREDICTED: ethylene-responsive transcription factor 1B-like [Gossypium raimondii]	AP2 domain. This 60 amino acid residue domain can bind to DNA and is found in transcription factor proteins.	ERF1; ethylene-responsive transcription factor 1
	57	Gh_A11G2282	PREDICTED: ethylene-responsive transcription factor 1B-like [Gossypium raimondii]	AP2 domain. This 60 amino acid residue domain can bind to DNA and is found in transcription factor proteins.	ERF1; ethylene-responsive transcription factor 1
	58	Gh_A13G1479	PREDICTED: ethylene-responsive transcription factor 1B-like [Gossypium raimondii]	AP2 domain. This 60 amino acid residue domain can bind to DNA and is found in transcription factor proteins.	ERF1; ethylene-responsive transcription factor 1
	59	Gh_A11G1199	PREDICTED: ethylene-responsive transcription factor 1B-like [Gossypium raimondii]	AP2 domain. This 60 amino acid residue domain can bind to DNA and is found in transcription factor proteins.	ERF1; ethylene-responsive transcription factor 1
	60	Gh_A08G1686	PREDICTED: ethylene-responsive transcription factor 15-like [Gossypium raimondii]	AP2 domain. This 60 amino acid residue domain can bind to DNA and is found in transcription factor proteins.	ERF1; ethylene-responsive transcription factor 1
	61	Gh_D08G1798	PREDICTED: ethylene-responsive transcription factor 2-like [Gossypium raimondii]	AP2 domain. This 60 amino acid residue domain can bind to DNA and is found in transcription factor proteins.	ERF2; ethylene-responsive transcription factor 2
	62	Gh_A09G2213	Ethylene receptor 2 -like protein [Gossypium arboreum]	Response regulator receiver domain. This domain receives the signal from the sensor partner in bacterial two-component systems. It is usually found N-terminal to a DNA binding effector domain.	ETR, ERS; ethylene receptor [EC:2.7.13.-]
	63	Gh_D09G2169	PREDICTED: ethylene receptor 2-like [Gossypium raimondii]	Response regulator receiver domain. This domain receives the signal from the sensor partner in bacterial two-component systems. It is usually found N-terminal to a DNA binding effector domain.	ETR, ERS; ethylene receptor [EC:2.7.13.-]
	64	Gh_A02G0358	Ethylene receptor 2 -like protein [Gossypium arboreum]	Response regulator receiver domain. This domain receives the signal from the sensor partner in bacterial two-component systems. It is usually found N-terminal to a DNA binding effector domain.	ETR, ERS; ethylene receptor [EC:2.7.13.-]
	65	Gh_D02G0417	PREDICTED: ethylene receptor 2 [Gossypium raimondii]	Response regulator receiver domain. This domain receives the signal from the sensor partner in bacterial two-component systems. It is usually found N-terminal to a DNA binding effector domain.	ETR, ERS; ethylene receptor [EC:2.7.13.-]
	66	Gh_A05G3362	PREDICTED: indole-3-acetic acid-amido synthetase GH3.17-like isoform X1 [Gossypium raimondii]	GH3 auxin-responsive promoter.	GH3; auxin responsive GH3 gene family
	67	Gh_D11G0514	PREDICTED: probable indole-3-acetic acid-amido synthetase GH3.1 [Gossypium raimondii]	GH3 auxin-responsive promoter.	GH3; auxin responsive GH3 gene family
	68	Gh_D11G1989	PREDICTED: probable indole-3-acetic acid-amido synthetase GH3.1 [Gossypium raimondii]	GH3 auxin-responsive promoter.	GH3; auxin responsive GH3 gene family
	69	Gh_A11G1993	Uncharacterized protein F383_10696 [Gossypium arboreum]	GH3 auxin-responsive promoter.	GH3; auxin responsive GH3 gene family
	70	Gh_A11G0443	Uncharacterized protein F383_11873 [Gossypium arboreum]	GH3 auxin-responsive promoter.	GH3; auxin responsive GH3 gene family
	71	Gh_A11G2575	hypothetical protein B456_007G323400 [Gossypium raimondii]	GH3 auxin-responsive promoter.	GH3; auxin responsive GH3 gene family
	72	Gh_D04G0262	PREDICTED: indole-3-acetic acid-amido synthetase GH3.17-like [Gossypium raimondii]	GH3 auxin-responsive promoter.	GH3; auxin responsive GH3 gene family
	73	Gh_D05G3387	PREDICTED: indole-3-acetic acid-amido synthetase GH3.17-like [Gossypium raimondii]	GH3 auxin-responsive promoter.	GH3; auxin responsive GH3 gene family
	74	Gh_D02G1794	PREDICTED: indole-3-acetic acid-amido synthetase GH3.17-like isoform X1 [Gossypium raimondii]	GH3 auxin-responsive promoter.	GH3; auxin responsive GH3 gene family
	75	Gh_D08G1981	PREDICTED: gibberellin receptor GID1B-like [Gossypium raimondii]	alpha/beta hydrolase fold. This catalytic domain is found in a very wide range of enzymes.	GID1; gibberellin receptor GID1 [EC:3.-.-.-]
	76	Gh_D11G1242	Gibberellin receptor GID1B -like protein [Gossypium arboreum]	alpha/beta hydrolase fold. This catalytic domain is found in a very wide range of enzymes.	GID1; gibberellin receptor GID1 [EC:3.-.-.-]
	77	Gh_A11G1091	Gibberellin receptor GID1B -like protein [Gossypium arboreum]	alpha/beta hydrolase fold. This catalytic domain is found in a very wide range of enzymes.	GID1; gibberellin receptor GID1 [EC:3.-.-.-]
	78	Gh_A12G0052	gibberellic acid receptor [Gossypium hirsutum]	alpha/beta hydrolase fold. This catalytic domain is found in a very wide range of enzymes.	GID1; gibberellin receptor GID1 [EC:3.-.-.-]
	79	Gh_D06G2039	PREDICTED: auxin-responsive protein IAA18-like [Gossypium raimondii]	AUX/IAA family. Transcription of the AUX/IAA family of genes is rapidly induced by the plant hormone auxin. Some members of this family are longer and contain an N terminal DNA binding domain. The function of this region is uncertain.	IAA; auxin-responsive protein IAA
	80	Gh_D12G1206	Auxin-responsive IAA30 -like protein [Gossypium arboreum]	AUX/IAA family. Transcription of the AUX/IAA family of genes is rapidly induced by the plant hormone auxin. Some members of this family are longer and contain an N terminal DNA binding domain. The function of this region is uncertain.	IAA; auxin-responsive protein IAA
	81	Gh_A10G0596	PREDICTED: auxin-induced protein 22D-like [Gossypium raimondii]	AUX/IAA family. Transcription of the AUX/IAA family of genes is rapidly induced by the plant hormone auxin. Some members of this family are longer and contain an N terminal DNA binding domain. The function of this region is uncertain.	IAA; auxin-responsive protein IAA
	82	Gh_D11G1005	PREDICTED: probable indole-3-acetic acid-amido synthetase GH3.5 [Gossypium raimondii]	GH3 auxin-responsive promoter.	JAR1; jasmonic acid-amino synthetase
	83	Gh_D11G1006	PREDICTED: probable indole-3-acetic acid-amido synthetase GH3.5 [Gossypium raimondii]	GH3 auxin-responsive promoter.	JAR1; jasmonic acid-amino synthetase
	84	Gh_A11G3064	PREDICTED: probable indole-3-acetic acid-amido synthetase GH3.5 [Gossypium raimondii]	GH3 auxin-responsive promoter.	JAR1; jasmonic acid-amino synthetase
	85	Gh_A11G3061	PREDICTED: probable indole-3-acetic acid-amido synthetase GH3.5 [Gossypium raimondii]	GH3 auxin-responsive promoter.	JAR1; jasmonic acid-amino synthetase
	86	Gh_D01G0196	PREDICTED: protein TIFY 9-like [Gossypium raimondii]	Divergent CCT motif. This short motif is found in a number of plant proteins. It appears to be related to the N-terminal half of the CCT motif. The CCT motif is about 45 amino acids long and contains a putative nuclear localisation signal within the second half of the CCT motif.	JAZ; jasmonate ZIM domain-containing protein
	87	Gh_D02G1776	hypothetical protein B456_005G196200 [Gossypium raimondii]	tify domain. This short possible domain is found in a variety of plant transcription factors that contain GATA domains as well as other motifs. Although previously known as the Zim domain this is now called the tify domain after its most conserved amino acids. TIFY proteins can be further classified into two groups depending on the presence (group I) or absence (group II) of a C2C2-GATA domain. F…	JAZ; jasmonate ZIM domain-containing protein
	88	Gh_A03G1341	PREDICTED: protein TIFY 9 [Gossypium raimondii]	Divergent CCT motif. This short motif is found in a number of plant proteins. It appears to be related to the N-terminal half of the CCT motif. The CCT motif is about 45 amino acids long and contains a putative nuclear localisation signal within the second half of the CCT motif.	JAZ; jasmonate ZIM domain-containing protein
	89	Gh_A05G1607	PREDICTED: auxin response factor 5 isoform X2 [Gossypium raimondii]	Auxin response factor. A conserved region of auxin-responsive transcription factors.	K14486, ARF; auxin response factor
	90	Gh_Sca038875G01	PREDICTED: transcription factor MYC3-like [Gossypium raimondii]	bHLH-MYC and R2R3-MYB transcription factors N-terminal. This is the N-terminal region of a family of MYB and MYC transcription factors. The DNA-binding HLH domain is further downstream, pfam00010. Members of the MYB and MYC family regulate the biosynthesis of phenylpropanoids in several plant species (DOI:10.1007/s11295-009-0232-y).	MYC2; transcription factor MYC2
	91	Gh_A09G0077	PREDICTED: regulatory protein NPR3-like [Gossypium raimondii]	NPR1/NIM1 like defence protein C terminal. This family of proteins is found in eukaryotes. Proteins in this family are typically between 251 and 588 amino acids in length. The family is found in association with pfam00023, pfam00651. There are two conserved sequence motifs: LENRV and DLN. NPR1 (NIM1) is a defence protein in many plant species.	NPR1; regulatory protein NPR1
	92	Gh_D08G2557	PREDICTED: protein phosphatase 2C 77-like isoform X1 [Gossypium raimondii]	Protein phosphatase 2C. Protein phosphatase 2C is a Mn++ or Mg++ dependent protein serine/threonine phosphatase.	PP2C; protein phosphatase 2C [EC:3.1.3.16]
	93	Gh_A08G2192	Protein phosphatase 2C 77 -like protein [Gossypium arboreum]	Protein phosphatase 2C. Protein phosphatase 2C is a Mn++ or Mg++ dependent protein serine/threonine phosphatase.	PP2C; protein phosphatase 2C [EC:3.1.3.16]
	94	Gh_D09G1743	PREDICTED: probable protein phosphatase 2C 51 [Gossypium raimondii]	Protein phosphatase 2C. Protein phosphatase 2C is a Mn++ or Mg++ dependent protein serine/threonine phosphatase.	PP2C; protein phosphatase 2C [EC:3.1.3.16]
	95	Gh_D03G1169	Protein phosphatase 2C 3 -like protein [Gossypium arboreum]	Protein phosphatase 2C. Protein phosphatase 2C is a Mn++ or Mg++ dependent protein serine/threonine phosphatase.	PP2C; protein phosphatase 2C [EC:3.1.3.16]
	96	Gh_A09G1649	PREDICTED: probable protein phosphatase 2C 51 [Gossypium raimondii]	Protein phosphatase 2C. Protein phosphatase 2C is a Mn++ or Mg++ dependent protein serine/threonine phosphatase.	PP2C; protein phosphatase 2C [EC:3.1.3.16]
	97	Gh_A12G0274	PREDICTED: pathogenesis-related protein 1-like [Gossypium raimondii]	Cysteine-rich secretory protein family. This is a large family of cysteine-rich secretory proteins, antigen 5, and pathogenesis-related 1 proteins (CAP) that are found in a wide range of organisms, including prokaryotes and non-vertebrate eukaryotes, The nine subfamilies of the mammalian CAP 'super'family include: the human glioma pathogenesis-related 1 (GLIPR1), Golgi associated pathogenesis rel…	PR1; pathogenesis-related protein 1
	98	Gh_D12G2819	PREDICTED: pathogenesis-related protein 1-like [Gossypium raimondii]	Cysteine-rich secretory protein family. This is a large family of cysteine-rich secretory proteins, antigen 5, and pathogenesis-related 1 proteins (CAP) that are found in a wide range of organisms, including prokaryotes and non-vertebrate eukaryotes, The nine subfamilies of the mammalian CAP 'super'family include: the human glioma pathogenesis-related 1 (GLIPR1), Golgi associated pathogenesis rel…	PR1; pathogenesis-related protein 1
	99	Gh_D09G0971	PREDICTED: pathogenesis-related protein 1-like [Gossypium raimondii]	Cysteine-rich secretory protein family. This is a large family of cysteine-rich secretory proteins, antigen 5, and pathogenesis-related 1 proteins (CAP) that are found in a wide range of organisms, including prokaryotes and non-vertebrate eukaryotes, The nine subfamilies of the mammalian CAP 'super'family include: the human glioma pathogenesis-related 1 (GLIPR1), Golgi associated pathogenesis rel…	PR1; pathogenesis-related protein 1
	100	Gh_A09G2421	PREDICTED: abscisic acid receptor PYL4-like [Gossypium raimondii]	Polyketide cyclase / dehydrase and lipid transport. This family contains polyketide cylcases/dehydrases which are enzymes involved in polyketide synthesis. It also includes other proteins of the START superfamily.	PYL; abscisic acid receptor PYR/PYL family
	101	Gh_D09G1585	PREDICTED: abscisic acid receptor PYL4-like [Gossypium raimondii]	Polyketide cyclase / dehydrase and lipid transport. This family contains polyketide cylcases/dehydrases which are enzymes involved in polyketide synthesis. It also includes other proteins of the START superfamily.	PYL; abscisic acid receptor PYR/PYL family
	102	Gh_D08G2587	PREDICTED: abscisic acid receptor PYL2-like [Gossypium raimondii]	Polyketide cyclase / dehydrase and lipid transport. This family contains polyketide cylcases/dehydrases which are enzymes involved in polyketide synthesis. It also includes other proteins of the START superfamily.	PYL; abscisic acid receptor PYR/PYL family
	103	Gh_A06G1418	PREDICTED: abscisic acid receptor PYL4-like [Gossypium raimondii]	Polyketide cyclase / dehydrase and lipid transport. This family contains polyketide cylcases/dehydrases which are enzymes involved in polyketide synthesis. It also includes other proteins of the START superfamily.	PYL; abscisic acid receptor PYR/PYL family
	104	Gh_A05G1922	PREDICTED: serine/threonine-protein kinase SAPK2-like isoform X1 [Gossypium raimondii]	Protein kinase domain.	SNRK2; serine/threonine-protein kinase SRK2 [EC:2.7.11.1]
	105	Gh_D05G2155	PREDICTED: serine/threonine-protein kinase SAPK2-like isoform X1 [Gossypium raimondii]	Protein kinase domain.	SNRK2; serine/threonine-protein kinase SRK2 [EC:2.7.11.1]
	106	Gh_D08G0272	PREDICTED: xyloglucan endotransglucosylase/hydrolase protein 22-like [Gossypium raimondii]	Glycosyl hydrolases family 16.	TCH4; xyloglucan:xyloglucosyl transferase TCH4 [EC:2.4.1.207]
	107	Gh_D12G0872	hypothetical protein B456_008G185000 [Gossypium raimondii]	Seed dormancy control. This family of plant proteins appears to be a highly specific controller seed dormancy.	TGA; transcription factor TGA
	108	Gh_D13G0732	PREDICTED: transcription factor HBP-1b(c38)-like isoform X5 [Gossypium raimondii]	Seed dormancy control. This family of plant proteins appears to be a highly specific controller seed dormancy.	TGA; transcription factor TGA
Down-regulated DEGs	1	Gh_Sca006585G01	hypothetical protein B456_001G242900 [Gossypium raimondii]	AUX/IAA family. Transcription of the AUX/IAA family of genes is rapidly induced by the plant hormone auxin. Some members of this family are longer and contain an N terminal DNA binding domain. The function of this region is uncertain.	IAA; auxin-responsive protein IAA
	2	Gh_A08G1014	transport inhibitor response 1 -like protein [Gossypium arboreum]	F-box-like. This is an F-box-like family.	TIR1; transport inhibitor response 1
	3	Gh_A08G0662	transport inhibitor response 1 [Gossypium hirsutum]	F-box-like. This is an F-box-like family.	TIR1; transport inhibitor response 1
	4	Gh_D10G0187	PREDICTED: protein TRANSPORT INHIBITOR RESPONSE 1-like [Gossypium raimondii]	F-box-like. This is an F-box-like family.	TIR1; transport inhibitor response 1
	5	Gh_D08G0763	PREDICTED: protein TRANSPORT INHIBITOR RESPONSE 1-like [Gossypium raimondii]	F-box-like. This is an F-box-like family.	TIR1; transport inhibitor response 1
	6	Gh_A11G1077	transport inhibitor response 1 -like protein [Gossypium arboreum]	F-box-like. This is an F-box-like family.	TIR1; transport inhibitor response 1
	7	Gh_D08G1288	PREDICTED: protein TRANSPORT INHIBITOR RESPONSE 1 [Gossypium raimondii]	F-box-like. This is an F-box-like family.	TIR1; transport inhibitor response 1
	8	Gh_D11G1228	PREDICTED: protein TRANSPORT INHIBITOR RESPONSE 1-like isoform X2 [Gossypium raimondii]	F-box domain. This domain is approximately 50 amino acids long, and is usually found in the N-terminal half of a variety of proteins. Two motifs that are commonly found associated with the F-box domain are the leucine rich repeats (LRRs; pfam00560 and pfam07723) and the WD repeat (pfam00400). The F-box domain has a role in mediating protein-protein interactions in a variety of contexts, such as p…	TIR1; transport inhibitor response 1
	9	Gh_A06G0329	Transcription factor TGA7 -like protein [Gossypium arboreum]	Seed dormancy control. This family of plant proteins appears to be a highly specific controller seed dormancy.	TGA; transcription factor TGA
	10	Gh_D10G0995	PREDICTED: transcription factor TGA4-like [Gossypium raimondii]	Seed dormancy control. This family of plant proteins appears to be a highly specific controller seed dormancy.	TGA; transcription factor TGA
	11	Gh_A02G0775	Transcription factor TGA7 [Gossypium arboreum]	Seed dormancy control. This family of plant proteins appears to be a highly specific controller seed dormancy.	TGA; transcription factor TGA
	12	Gh_A10G0769	PREDICTED: transcription factor TGA4-like [Gossypium raimondii]	Seed dormancy control. This family of plant proteins appears to be a highly specific controller seed dormancy.	TGA; transcription factor TGA
	13	Gh_A01G1578	PREDICTED: transcription factor TGA3-like [Gossypium raimondii]	Seed dormancy control. This family of plant proteins appears to be a highly specific controller seed dormancy.	TGA; transcription factor TGA
	14	Gh_D01G1881	PREDICTED: transcription factor TGA3-like [Gossypium raimondii]	Seed dormancy control. This family of plant proteins appears to be a highly specific controller seed dormancy.	TGA; transcription factor TGA
	15	Gh_D06G0357	PREDICTED: transcription factor TGA7-like [Gossypium raimondii]	Seed dormancy control. This family of plant proteins appears to be a highly specific controller seed dormancy.	TGA; transcription factor TGA
	16	Gh_D05G3030	PREDICTED: xyloglucan endotransglucosylase/hydrolase protein 22-like [Gossypium raimondii]	Glycosyl hydrolases family 16.	TCH4; xyloglucan:xyloglucosyl transferase TCH4 [EC:2.4.1.207]
	17	Gh_A05G2724	Xyloglucan endotransglucosylase/hydrolase 22 -like protein [Gossypium arboreum]	Glycosyl hydrolases family 16.	TCH4; xyloglucan:xyloglucosyl transferase TCH4 [EC:2.4.1.207]
	18	Gh_D03G0483	hypothetical protein B456_003G052400 [Gossypium raimondii]	Glycosyl hydrolases family 16.	TCH4; xyloglucan:xyloglucosyl transferase TCH4 [EC:2.4.1.207]
	19	Gh_D02G0992	hypothetical protein B456_005G113400 [Gossypium raimondii]	Glycosyl hydrolases family 16.	TCH4; xyloglucan:xyloglucosyl transferase TCH4 [EC:2.4.1.207]
	20	Gh_D10G1083	PREDICTED: serine/threonine-protein kinase SRK2A [Gossypium raimondii]	Protein kinase domain.	SNRK2; serine/threonine-protein kinase SRK2 [EC:2.7.11.1]
	21	Gh_D03G0174	hypothetical protein B456_003G079400 [Gossypium raimondii]	Protein kinase domain.	SNRK2; serine/threonine-protein kinase SRK2 [EC:2.7.11.1]
	22	Gh_D02G0839	PREDICTED: serine/threonine-protein kinase SAPK2-like isoform X1 [Gossypium raimondii]	Protein kinase domain.	SNRK2; serine/threonine-protein kinase SRK2 [EC:2.7.11.1]
	23	Gh_Sca020881G01	hypothetical protein B456_003G079400 [Gossypium raimondii]	Protein kinase domain.	SNRK2; serine/threonine-protein kinase SRK2 [EC:2.7.11.1]
	24	Gh_D07G0405	PREDICTED: serine/threonine-protein kinase SRK2G-like [Gossypium raimondii]	Protein kinase domain.	SNRK2; serine/threonine-protein kinase SRK2 [EC:2.7.11.1]
	25	Gh_D08G1765	PREDICTED: serine/threonine-protein kinase SAPK3-like [Gossypium raimondii]	Protein kinase domain.	SNRK2; serine/threonine-protein kinase SRK2 [EC:2.7.11.1]
	26	Gh_A12G0641	PREDICTED: serine/threonine-protein kinase SRK2I [Gossypium raimondii]	Protein kinase domain.	SNRK2; serine/threonine-protein kinase SRK2 [EC:2.7.11.1]
	27	Gh_A12G0247	PREDICTED: serine/threonine-protein kinase SRK2B [Gossypium raimondii]	Protein kinase domain.	SNRK2; serine/threonine-protein kinase SRK2 [EC:2.7.11.1]
	28	Gh_A02G0789	PREDICTED: serine/threonine-protein kinase SAPK2-like isoform X1 [Gossypium raimondii]	Protein kinase domain.	SNRK2; serine/threonine-protein kinase SRK2 [EC:2.7.11.1]
	29	Gh_D08G1226	PREDICTED: abscisic acid receptor PYL8-like [Gossypium raimondii]	Z1 domain. This uncharacterized domain was identified by Iyer and colleagues. It is found associated with a helicase domain of superfamily type II.	PYL; abscisic acid receptor PYR/PYL family
	30	Gh_D08G1399	PREDICTED: abscisic acid receptor PYL9-like [Gossypium raimondii]	Polyketide cyclase / dehydrase and lipid transport. This family contains polyketide cylcases/dehydrases which are enzymes involved in polyketide synthesis. It also includes other proteins of the START superfamily.	PYL; abscisic acid receptor PYR/PYL family
	31	Gh_D05G2920	PREDICTED: abscisic acid receptor PYL4-like [Gossypium raimondii]	Polyketide cyclase / dehydrase and lipid transport. This family contains polyketide cylcases/dehydrases which are enzymes involved in polyketide synthesis. It also includes other proteins of the START superfamily.	PYL; abscisic acid receptor PYR/PYL family
	32	Gh_Sca004823G01	PREDICTED: pathogenesis-related protein 1-like [Gossypium raimondii]	Cysteine-rich secretory protein family. This is a large family of cysteine-rich secretory proteins, antigen 5, and pathogenesis-related 1 proteins (CAP) that are found in a wide range of organisms, including prokaryotes and non-vertebrate eukaryotes, The nine subfamilies of the mammalian CAP 'super'family include: the human glioma pathogenesis-related 1 (GLIPR1), Golgi associated pathogenesis rel…	PR1; pathogenesis-related protein 1
	33	Gh_D05G3907	PREDICTED: probable protein phosphatase 2C 24 [Gossypium raimondii]	Protein phosphatase 2C. Protein phosphatase 2C is a Mn++ or Mg++ dependent protein serine/threonine phosphatase.	PP2C; protein phosphatase 2C [EC:3.1.3.16]
	34	Gh_A10G1998	Protein phosphatase 2C 37 -like protein [Gossypium arboreum]	Protein phosphatase 2C. Protein phosphatase 2C is a Mn++ or Mg++ dependent protein serine/threonine phosphatase.	PP2C; protein phosphatase 2C [EC:3.1.3.16]
	35	Gh_A12G2380	putative phosphatase 2C 75 -like protein [Gossypium arboreum]	Protein phosphatase 2C. Protein phosphatase 2C is a Mn++ or Mg++ dependent protein serine/threonine phosphatase.	PP2C; protein phosphatase 2C [EC:3.1.3.16]
	36	Gh_A05G0782	Protein phosphatase 2C 3 -like protein [Gossypium arboreum]	Protein phosphatase 2C. Protein phosphatase 2C is a Mn++ or Mg++ dependent protein serine/threonine phosphatase.	PP2C; protein phosphatase 2C [EC:3.1.3.16]
	37	Gh_A13G0184	protein phosphatase PP2C [Gossypium hirsutum]	Protein phosphatase 2C. Protein phosphatase 2C is a Mn++ or Mg++ dependent protein serine/threonine phosphatase.	PP2C; protein phosphatase 2C [EC:3.1.3.16]
	38	Gh_A05G0308	Protein phosphatase 2C 16 -like protein [Gossypium arboreum]	Protein phosphatase 2C. Protein phosphatase 2C is a Mn++ or Mg++ dependent protein serine/threonine phosphatase.	PP2C; protein phosphatase 2C [EC:3.1.3.16]
	39	Gh_D13G2089	PREDICTED: protein phosphatase 2C 77-like isoform X1 [Gossypium raimondii]	Protein phosphatase 2C. Protein phosphatase 2C is a Mn++ or Mg++ dependent protein serine/threonine phosphatase.	PP2C; protein phosphatase 2C [EC:3.1.3.16]
	40	Gh_A06G0579	Protein phosphatase 2C 56 -like protein [Gossypium arboreum]	Protein phosphatase 2C. Protein phosphatase 2C is a Mn++ or Mg++ dependent protein serine/threonine phosphatase.	PP2C; protein phosphatase 2C [EC:3.1.3.16]
	41	Gh_D13G0199	protein phosphatase PP2C [Gossypium hirsutum]	Protein phosphatase 2C. Protein phosphatase 2C is a Mn++ or Mg++ dependent protein serine/threonine phosphatase.	PP2C; protein phosphatase 2C [EC:3.1.3.16]
	42	Gh_D05G0410	PREDICTED: probable protein phosphatase 2C 53 [Gossypium raimondii]	Protein phosphatase 2C. Protein phosphatase 2C is a Mn++ or Mg++ dependent protein serine/threonine phosphatase.	PP2C; protein phosphatase 2C [EC:3.1.3.16]
	43	Gh_D10G2305	PREDICTED: protein phosphatase 2C 37 [Gossypium raimondii]	Protein phosphatase 2C. Protein phosphatase 2C is a Mn++ or Mg++ dependent protein serine/threonine phosphatase.	PP2C; protein phosphatase 2C [EC:3.1.3.16]
	44	Gh_D12G2424	PREDICTED: probable protein phosphatase 2C 8 isoform X1 [Gossypium raimondii]	Protein phosphatase 2C. Protein phosphatase 2C is a Mn++ or Mg++ dependent protein serine/threonine phosphatase.	PP2C; protein phosphatase 2C [EC:3.1.3.16]
	45	Gh_A13G1741	Protein phosphatase 2C 56 -like protein [Gossypium arboreum]	Protein phosphatase 2C. Protein phosphatase 2C is a Mn++ or Mg++ dependent protein serine/threonine phosphatase.	PP2C; protein phosphatase 2C [EC:3.1.3.16]
	46	Gh_D07G1303	PREDICTED: transcription factor PIL1 [Gossypium raimondii]	Helix-loop-helix DNA-binding domain.	PIF3; phytochrome-interacting factor 3
	47	Gh_D11G1107	PREDICTED: uncharacterized protein LOC105802905 [Gossypium raimondii]	Helix-loop-helix DNA-binding domain.	PIF3; phytochrome-interacting factor 3
	48	Gh_A11G2494	Transcription factor PIF3 [Gossypium arboreum]	Helix-loop-helix DNA-binding domain.	PIF3; phytochrome-interacting factor 3
	49	Gh_D11G2839	PREDICTED: transcription factor PIF3 [Gossypium raimondii]	Helix-loop-helix DNA-binding domain.	PIF3; phytochrome-interacting factor 3
	50	Gh_A07G1202	Transcription factor PIF3 [Gossypium arboreum]	Helix-loop-helix DNA-binding domain.	PIF3; phytochrome-interacting factor 3
	51	Gh_A11G3067	Transcription factor PIF3 -like protein [Gossypium arboreum]	Helix-loop-helix DNA-binding domain.	PIF3; phytochrome-interacting factor 3
	52	Gh_A01G1644	Regulatory NPR5 -like protein [Gossypium arboreum]	Ankyrin repeats (3 copies).	NPR1; regulatory protein NPR1
	53	Gh_D01G1890	Regulatory NPR5 -like protein [Gossypium arboreum]	Ankyrin repeats (3 copies).	NPR1; regulatory protein NPR1
	54	Gh_A09G1115	Regulatory NPR5 -like protein [Gossypium arboreum]	Ankyrin repeats (3 copies).	NPR1; regulatory protein NPR1
	55	Gh_D09G1120	Regulatory NPR5 -like protein [Gossypium arboreum]	Ankyrin repeats (3 copies).	NPR1; regulatory protein NPR1
	56	Gh_Sca047620G01	PREDICTED: regulatory protein NPR5 isoform X2 [Gossypium raimondii]	Ankyrin repeats (3 copies).	NPR1; regulatory protein NPR1
	57	Gh_A08G1412	bHLH domain protein [Gossypium hirsutum]	bHLH-MYC and R2R3-MYB transcription factors N-terminal. This is the N-terminal region of a family of MYB and MYC transcription factors. The DNA-binding HLH domain is further downstream, pfam00010. Members of the MYB and MYC family regulate the biosynthesis of phenylpropanoids in several plant species (DOI:10.1007/s11295-009-0232-y).	MYC2; transcription factor MYC2
	58	Gh_D08G1707	PREDICTED: transcription factor MYC2-like [Gossypium raimondii]	bHLH-MYC and R2R3-MYB transcription factors N-terminal. This is the N-terminal region of a family of MYB and MYC transcription factors. The DNA-binding HLH domain is further downstream, pfam00010. Members of the MYB and MYC family regulate the biosynthesis of phenylpropanoids in several plant species (DOI:10.1007/s11295-009-0232-y).	MYC2; transcription factor MYC2
	59	Gh_A06G2038	hypothetical protein B456_010G157400 [Gossypium raimondii]	Auxin response factor. A conserved region of auxin-responsive transcription factors.	K14486, ARF; auxin response factor
	60	Gh_D11G1233	PREDICTED: auxin response factor 23-like isoform X1 [Gossypium raimondii]	Auxin response factor. A conserved region of auxin-responsive transcription factors.	K14486, ARF; auxin response factor
	61	Gh_A05G1337	hypothetical protein B456_009G166100 [Gossypium raimondii]	Auxin response factor. A conserved region of auxin-responsive transcription factors.	K14486, ARF; auxin response factor
	62	Gh_D05G1506	hypothetical protein B456_009G166100 [Gossypium raimondii]	Auxin response factor. A conserved region of auxin-responsive transcription factors.	K14486, ARF; auxin response factor
	63	Gh_D06G1415	PREDICTED: auxin response factor 3-like isoform X1 [Gossypium raimondii]	Auxin response factor. A conserved region of auxin-responsive transcription factors.	K14486, ARF; auxin response factor
	64	Gh_A10G0266	Auxin response factor 3 [Gossypium arboreum]	Auxin response factor. A conserved region of auxin-responsive transcription factors.	K14486, ARF; auxin response factor
	65	Gh_D07G0152	PREDICTED: protein TIFY 10B [Gossypium raimondii]	Divergent CCT motif. This short motif is found in a number of plant proteins. It appears to be related to the N-terminal half of the CCT motif. The CCT motif is about 45 amino acids long and contains a putative nuclear localisation signal within the second half of the CCT motif.	JAZ; jasmonate ZIM domain-containing protein
	66	Gh_A05G2675	Protein TIFY 6B -like protein [Gossypium arboreum]	tify domain. This short possible domain is found in a variety of plant transcription factors that contain GATA domains as well as other motifs. Although previously known as the Zim domain this is now called the tify domain after its most conserved amino acids. TIFY proteins can be further classified into two groups depending on the presence (group I) or absence (group II) of a C2C2-GATA domain. F…	JAZ; jasmonate ZIM domain-containing protein
	67	Gh_A06G0705	Protein TIFY 10A -like protein [Gossypium arboreum]	tify domain. This short possible domain is found in a variety of plant transcription factors that contain GATA domains as well as other motifs. Although previously known as the Zim domain this is now called the tify domain after its most conserved amino acids. TIFY proteins can be further classified into two groups depending on the presence (group I) or absence (group II) of a C2C2-GATA domain. F…	JAZ; jasmonate ZIM domain-containing protein
	68	Gh_D12G2567	PREDICTED: protein TIFY 6B-like [Gossypium raimondii]	tify domain. This short possible domain is found in a variety of plant transcription factors that contain GATA domains as well as other motifs. Although previously known as the Zim domain this is now called the tify domain after its most conserved amino acids. TIFY proteins can be further classified into two groups depending on the presence (group I) or absence (group II) of a C2C2-GATA domain. F…	JAZ; jasmonate ZIM domain-containing protein
	69	Gh_D06G0810	PREDICTED: protein TIFY 10A-like [Gossypium raimondii]	tify domain. This short possible domain is found in a variety of plant transcription factors that contain GATA domains as well as other motifs. Although previously known as the Zim domain this is now called the tify domain after its most conserved amino acids. TIFY proteins can be further classified into two groups depending on the presence (group I) or absence (group II) of a C2C2-GATA domain. F…	JAZ; jasmonate ZIM domain-containing protein
	70	Gh_D05G1332	PREDICTED: protein TIFY 11B-like [Gossypium raimondii]	tify domain. This short possible domain is found in a variety of plant transcription factors that contain GATA domains as well as other motifs. Although previously known as the Zim domain this is now called the tify domain after its most conserved amino acids. TIFY proteins can be further classified into two groups depending on the presence (group I) or absence (group II) of a C2C2-GATA domain. F…	JAZ; jasmonate ZIM domain-containing protein
	71	Gh_A01G1225	Protein TIFY 6B -like protein [Gossypium arboreum]	tify domain. This short possible domain is found in a variety of plant transcription factors that contain GATA domains as well as other motifs. Although previously known as the Zim domain this is now called the tify domain after its most conserved amino acids. TIFY proteins can be further classified into two groups depending on the presence (group I) or absence (group II) of a C2C2-GATA domain. F…	JAZ; jasmonate ZIM domain-containing protein
	72	Gh_A05G0260	Protein TIFY 10A -like protein [Gossypium arboreum]	tify domain. This short possible domain is found in a variety of plant transcription factors that contain GATA domains as well as other motifs. Although previously known as the Zim domain this is now called the tify domain after its most conserved amino acids. TIFY proteins can be further classified into two groups depending on the presence (group I) or absence (group II) of a C2C2-GATA domain. F…	JAZ; jasmonate ZIM domain-containing protein
	73	Gh_D05G0379	PREDICTED: protein TIFY 3B-like isoform X1 [Gossypium raimondii]	tify domain. This short possible domain is found in a variety of plant transcription factors that contain GATA domains as well as other motifs. Although previously known as the Zim domain this is now called the tify domain after its most conserved amino acids. TIFY proteins can be further classified into two groups depending on the presence (group I) or absence (group II) of a C2C2-GATA domain. F…	JAZ; jasmonate ZIM domain-containing protein
	74	Gh_D05G2975	JAZ12 [Gossypium barbadense]	tify domain. This short possible domain is found in a variety of plant transcription factors that contain GATA domains as well as other motifs. Although previously known as the Zim domain this is now called the tify domain after its most conserved amino acids. TIFY proteins can be further classified into two groups depending on the presence (group I) or absence (group II) of a C2C2-GATA domain. F…	JAZ; jasmonate ZIM domain-containing protein
	75	Gh_D13G0668	PREDICTED: probable indole-3-acetic acid-amido synthetase GH3.5 [Gossypium raimondii]	GH3 auxin-responsive promoter.	JAR1; jasmonic acid-amino synthetase
	76	Gh_A13G0480	PREDICTED: probable indole-3-acetic acid-amido synthetase GH3.5 [Gossypium raimondii]	GH3 auxin-responsive promoter.	JAR1; jasmonic acid-amino synthetase
	77	Gh_D06G2010	PREDICTED: auxin-induced protein AUX22-like [Gossypium raimondii]	AUX/IAA family. Transcription of the AUX/IAA family of genes is rapidly induced by the plant hormone auxin. Some members of this family are longer and contain an N terminal DNA binding domain. The function of this region is uncertain.	IAA; auxin-responsive protein IAA
	78	Gh_D05G0138	auxin-responsive protein [Gossypium hirsutum]	AUX/IAA family. Transcription of the AUX/IAA family of genes is rapidly induced by the plant hormone auxin. Some members of this family are longer and contain an N terminal DNA binding domain. The function of this region is uncertain.	IAA; auxin-responsive protein IAA
	79	Gh_A09G1947	auxin-responsive protein [Gossypium hirsutum]	AUX/IAA family. Transcription of the AUX/IAA family of genes is rapidly induced by the plant hormone auxin. Some members of this family are longer and contain an N terminal DNA binding domain. The function of this region is uncertain.	IAA; auxin-responsive protein IAA
	80	Gh_A09G1997	PREDICTED: auxin-responsive protein IAA12-like isoform X1 [Gossypium raimondii]	AUX/IAA family. Transcription of the AUX/IAA family of genes is rapidly induced by the plant hormone auxin. Some members of this family are longer and contain an N terminal DNA binding domain. The function of this region is uncertain.	IAA; auxin-responsive protein IAA
	81	Gh_A02G1156	Auxin-responsive IAA27 -like protein [Gossypium arboreum]	AUX/IAA family. Transcription of the AUX/IAA family of genes is rapidly induced by the plant hormone auxin. Some members of this family are longer and contain an N terminal DNA binding domain. The function of this region is uncertain.	IAA; auxin-responsive protein IAA
	82	Gh_A05G0356	PREDICTED: auxin-responsive protein IAA6-like [Gossypium raimondii]	AUX/IAA family. Transcription of the AUX/IAA family of genes is rapidly induced by the plant hormone auxin. Some members of this family are longer and contain an N terminal DNA binding domain. The function of this region is uncertain.	IAA; auxin-responsive protein IAA
	83	Gh_A10G0575	PREDICTED: auxin-responsive protein IAA26-like [Gossypium raimondii]	AUX/IAA family. Transcription of the AUX/IAA family of genes is rapidly induced by the plant hormone auxin. Some members of this family are longer and contain an N terminal DNA binding domain. The function of this region is uncertain.	IAA; auxin-responsive protein IAA
	84	Gh_A08G1074	PREDICTED: auxin-responsive protein IAA20-like [Gossypium raimondii]	AUX/IAA family. Transcription of the AUX/IAA family of genes is rapidly induced by the plant hormone auxin. Some members of this family are longer and contain an N terminal DNA binding domain. The function of this region is uncertain.	IAA; auxin-responsive protein IAA
	85	Gh_D09G2153	hypothetical protein B456_006G246000 [Gossypium raimondii]	AUX/IAA family. Transcription of the AUX/IAA family of genes is rapidly induced by the plant hormone auxin. Some members of this family are longer and contain an N terminal DNA binding domain. The function of this region is uncertain.	IAA; auxin-responsive protein IAA
	86	Gh_A07G0317	PREDICTED: auxin-responsive protein IAA4-like [Gossypium raimondii]	AUX/IAA family. Transcription of the AUX/IAA family of genes is rapidly induced by the plant hormone auxin. Some members of this family are longer and contain an N terminal DNA binding domain. The function of this region is uncertain.	IAA; auxin-responsive protein IAA
	87	Gh_D10G0616	hypothetical protein B456_011G070800 [Gossypium raimondii]	AUX/IAA family. Transcription of the AUX/IAA family of genes is rapidly induced by the plant hormone auxin. Some members of this family are longer and contain an N terminal DNA binding domain. The function of this region is uncertain.	IAA; auxin-responsive protein IAA
	88	Gh_A02G0341	Auxin-responsive IAA14 -like protein [Gossypium arboreum]	AUX/IAA family. Transcription of the AUX/IAA family of genes is rapidly induced by the plant hormone auxin. Some members of this family are longer and contain an N terminal DNA binding domain. The function of this region is uncertain.	IAA; auxin-responsive protein IAA
	89	Gh_A11G2241	PREDICTED: auxin-responsive protein IAA16-like [Gossypium raimondii]	AUX/IAA family. Transcription of the AUX/IAA family of genes is rapidly induced by the plant hormone auxin. Some members of this family are longer and contain an N terminal DNA binding domain. The function of this region is uncertain.	IAA; auxin-responsive protein IAA
	90	Gh_D10G1600	hypothetical protein B456_011G180100 [Gossypium raimondii]	AUX/IAA family. Transcription of the AUX/IAA family of genes is rapidly induced by the plant hormone auxin. Some members of this family are longer and contain an N terminal DNA binding domain. The function of this region is uncertain.	IAA; auxin-responsive protein IAA
	91	Gh_A08G2136	Auxin-responsive IAA16 -like protein [Gossypium arboreum]	AUX/IAA family. Transcription of the AUX/IAA family of genes is rapidly induced by the plant hormone auxin. Some members of this family are longer and contain an N terminal DNA binding domain. The function of this region is uncertain.	IAA; auxin-responsive protein IAA
	92	Gh_D05G0249	hypothetical protein B456_009G026700 [Gossypium raimondii]	AUX/IAA family. Transcription of the AUX/IAA family of genes is rapidly induced by the plant hormone auxin. Some members of this family are longer and contain an N terminal DNA binding domain. The function of this region is uncertain.	IAA; auxin-responsive protein IAA
	93	Gh_D09G2198	PREDICTED: auxin-responsive protein IAA12-like isoform X1 [Gossypium raimondii]	AUX/IAA family. Transcription of the AUX/IAA family of genes is rapidly induced by the plant hormone auxin. Some members of this family are longer and contain an N terminal DNA binding domain. The function of this region is uncertain.	IAA; auxin-responsive protein IAA
	94	Gh_D10G1512	PREDICTED: auxin-responsive protein IAA4-like isoform X1 [Gossypium raimondii]	AUX/IAA family. Transcription of the AUX/IAA family of genes is rapidly induced by the plant hormone auxin. Some members of this family are longer and contain an N terminal DNA binding domain. The function of this region is uncertain.	IAA; auxin-responsive protein IAA
	95	Gh_A05G0429	Auxin-responsive IAA29 -like protein [Gossypium arboreum]	AUX/IAA family. Transcription of the AUX/IAA family of genes is rapidly induced by the plant hormone auxin. Some members of this family are longer and contain an N terminal DNA binding domain. The function of this region is uncertain.	IAA; auxin-responsive protein IAA
	96	Gh_A05G1068	PREDICTED: auxin-induced protein AUX22 [Gossypium raimondii]	AUX/IAA family. Transcription of the AUX/IAA family of genes is rapidly induced by the plant hormone auxin. Some members of this family are longer and contain an N terminal DNA binding domain. The function of this region is uncertain.	IAA; auxin-responsive protein IAA
	97	Gh_A05G1067	IAA16 protein [Gossypium hirsutum]	AUX/IAA family. Transcription of the AUX/IAA family of genes is rapidly induced by the plant hormone auxin. Some members of this family are longer and contain an N terminal DNA binding domain. The function of this region is uncertain.	IAA; auxin-responsive protein IAA
	98	Gh_D06G0506	hypothetical protein B456_010G062000 [Gossypium raimondii]	AUX/IAA family. Transcription of the AUX/IAA family of genes is rapidly induced by the plant hormone auxin. Some members of this family are longer and contain an N terminal DNA binding domain. The function of this region is uncertain.	IAA; auxin-responsive protein IAA
	99	Gh_A13G1489	Auxin-responsive IAA16 -like protein [Gossypium arboreum]	AUX/IAA family. Transcription of the AUX/IAA family of genes is rapidly induced by the plant hormone auxin. Some members of this family are longer and contain an N terminal DNA binding domain. The function of this region is uncertain.	IAA; auxin-responsive protein IAA
	100	Gh_D08G1355	PREDICTED: auxin-responsive protein IAA20-like [Gossypium raimondii]	AUX/IAA family. Transcription of the AUX/IAA family of genes is rapidly induced by the plant hormone auxin. Some members of this family are longer and contain an N terminal DNA binding domain. The function of this region is uncertain.	IAA; auxin-responsive protein IAA
	101	Gh_A05G3954	Auxin-responsive IAA27 -like protein [Gossypium arboreum]	AUX/IAA family. Transcription of the AUX/IAA family of genes is rapidly induced by the plant hormone auxin. Some members of this family are longer and contain an N terminal DNA binding domain. The function of this region is uncertain.	IAA; auxin-responsive protein IAA
	102	Gh_A05G0079	auxin-responsive protein [Gossypium hirsutum]	AUX/IAA family. Transcription of the AUX/IAA family of genes is rapidly induced by the plant hormone auxin. Some members of this family are longer and contain an N terminal DNA binding domain. The function of this region is uncertain.	IAA; auxin-responsive protein IAA
	103	Gh_D11G1320	PREDICTED: auxin-induced protein AUX28-like [Gossypium raimondii]	AUX/IAA family. Transcription of the AUX/IAA family of genes is rapidly induced by the plant hormone auxin. Some members of this family are longer and contain an N terminal DNA binding domain. The function of this region is uncertain.	IAA; auxin-responsive protein IAA
	104	Gh_D07G0374	auxin-responsive IAA29-like protein [Gossypium hirsutum]	AUX/IAA family. Transcription of the AUX/IAA family of genes is rapidly induced by the plant hormone auxin. Some members of this family are longer and contain an N terminal DNA binding domain. The function of this region is uncertain.	IAA; auxin-responsive protein IAA
	105	Gh_D05G1216	PREDICTED: auxin-responsive protein IAA16 [Gossypium raimondii]	AUX/IAA family. Transcription of the AUX/IAA family of genes is rapidly induced by the plant hormone auxin. Some members of this family are longer and contain an N terminal DNA binding domain. The function of this region is uncertain.	IAA; auxin-responsive protein IAA
	106	Gh_D05G1217	PREDICTED: auxin-induced protein AUX22 [Gossypium raimondii]	AUX/IAA family. Transcription of the AUX/IAA family of genes is rapidly induced by the plant hormone auxin. Some members of this family are longer and contain an N terminal DNA binding domain. The function of this region is uncertain.	IAA; auxin-responsive protein IAA
	107	Gh_D05G0568	PREDICTED: auxin-responsive protein IAA29 [Gossypium raimondii]	AUX/IAA family. Transcription of the AUX/IAA family of genes is rapidly induced by the plant hormone auxin. Some members of this family are longer and contain an N terminal DNA binding domain. The function of this region is uncertain.	IAA; auxin-responsive protein IAA
	108	Gh_D13G1818	auxin-responsive protein [Gossypium hirsutum]	AUX/IAA family. Transcription of the AUX/IAA family of genes is rapidly induced by the plant hormone auxin. Some members of this family are longer and contain an N terminal DNA binding domain. The function of this region is uncertain.	IAA; auxin-responsive protein IAA
	109	Gh_D08G2503	PREDICTED: auxin-responsive protein IAA1-like [Gossypium raimondii]	AUX/IAA family. Transcription of the AUX/IAA family of genes is rapidly induced by the plant hormone auxin. Some members of this family are longer and contain an N terminal DNA binding domain. The function of this region is uncertain.	IAA; auxin-responsive protein IAA
	110	Gh_A11G1164	PREDICTED: auxin-induced protein AUX28-like [Gossypium raimondii]	AUX/IAA family. Transcription of the AUX/IAA family of genes is rapidly induced by the plant hormone auxin. Some members of this family are longer and contain an N terminal DNA binding domain. The function of this region is uncertain.	IAA; auxin-responsive protein IAA
	111	Gh_D11G2552	PREDICTED: auxin-responsive protein IAA16-like [Gossypium raimondii]	AUX/IAA family. Transcription of the AUX/IAA family of genes is rapidly induced by the plant hormone auxin. Some members of this family are longer and contain an N terminal DNA binding domain. The function of this region is uncertain.	IAA; auxin-responsive protein IAA
	112	Gh_A05G1076	hypothetical protein B456_009G135900 [Gossypium raimondii]	AUX/IAA family. Transcription of the AUX/IAA family of genes is rapidly induced by the plant hormone auxin. Some members of this family are longer and contain an N terminal DNA binding domain. The function of this region is uncertain.	IAA; auxin-responsive protein IAA
	113	Gh_D05G0472	PREDICTED: auxin-responsive protein IAA6-like [Gossypium raimondii]	AUX/IAA family. Transcription of the AUX/IAA family of genes is rapidly induced by the plant hormone auxin. Some members of this family are longer and contain an N terminal DNA binding domain. The function of this region is uncertain.	IAA; auxin-responsive protein IAA
	114	Gh_D05G1269	Auxin-responsive IAA26 -like protein [Gossypium arboreum]	AUX/IAA family. Transcription of the AUX/IAA family of genes is rapidly induced by the plant hormone auxin. Some members of this family are longer and contain an N terminal DNA binding domain. The function of this region is uncertain.	IAA; auxin-responsive protein IAA
	115	Gh_D02G2389	PREDICTED: auxin-responsive protein IAA14-like [Gossypium raimondii]	AUX/IAA family. Transcription of the AUX/IAA family of genes is rapidly induced by the plant hormone auxin. Some members of this family are longer and contain an N terminal DNA binding domain. The function of this region is uncertain.	IAA; auxin-responsive protein IAA
	116	Gh_D07G2125	hypothetical protein B456_001G242900 [Gossypium raimondii]	AUX/IAA family. Transcription of the AUX/IAA family of genes is rapidly induced by the plant hormone auxin. Some members of this family are longer and contain an N terminal DNA binding domain. The function of this region is uncertain.	IAA; auxin-responsive protein IAA
	117	Gh_D05G3823	PREDICTED: auxin-responsive protein IAA8-like [Gossypium raimondii]	AUX/IAA family. Transcription of the AUX/IAA family of genes is rapidly induced by the plant hormone auxin. Some members of this family are longer and contain an N terminal DNA binding domain. The function of this region is uncertain.	IAA; auxin-responsive protein IAA
	118	Gh_A10G1020	PREDICTED: auxin-responsive protein IAA4-like isoform X2 [Gossypium raimondii]	AUX/IAA family. Transcription of the AUX/IAA family of genes is rapidly induced by the plant hormone auxin. Some members of this family are longer and contain an N terminal DNA binding domain. The function of this region is uncertain.	IAA; auxin-responsive protein IAA
	119	Gh_D05G2503	PREDICTED: F-box protein GID2-like [Gossypium raimondii]	F-box domain. This domain is approximately 50 amino acids long, and is usually found in the N-terminal half of a variety of proteins. Two motifs that are commonly found associated with the F-box domain are the leucine rich repeats (LRRs; pfam00560 and pfam07723) and the WD repeat (pfam00400). The F-box domain has a role in mediating protein-protein interactions in a variety of contexts, such as p…	GID2, SLY1; F-box protein GID2
	120	Gh_A05G2244	F-box protein [Gossypium hirsutum]	F-box domain. This domain is approximately 50 amino acids long, and is usually found in the N-terminal half of a variety of proteins. Two motifs that are commonly found associated with the F-box domain are the leucine rich repeats (LRRs; pfam00560 and pfam07723) and the WD repeat (pfam00400). The F-box domain has a role in mediating protein-protein interactions in a variety of contexts, such as p…	GID2, SLY1; F-box protein GID2
	121	Gh_A13G1517	GID1-6 [Gossypium hirsutum]	alpha/beta hydrolase fold. This catalytic domain is found in a very wide range of enzymes.	GID1; gibberellin receptor GID1 [EC:3.-.-.-]
	122	Gh_A13G1518	GID1-5 [Gossypium hirsutum]	alpha/beta hydrolase fold. This catalytic domain is found in a very wide range of enzymes.	GID1; gibberellin receptor GID1 [EC:3.-.-.-]
	123	Gh_D13G1846	PREDICTED: gibberellin receptor GID1C-like isoform X1 [Gossypium raimondii]	alpha/beta hydrolase fold. This catalytic domain is found in a very wide range of enzymes.	GID1; gibberellin receptor GID1 [EC:3.-.-.-]
	124	Gh_D13G1847	PREDICTED: gibberellin receptor GID1C-like isoform X1 [Gossypium raimondii]	alpha/beta hydrolase fold. This catalytic domain is found in a very wide range of enzymes.	GID1; gibberellin receptor GID1 [EC:3.-.-.-]
	125	Gh_A04G0281	hypothetical protein B456_009G382000 [Gossypium raimondii]	GH3 auxin-responsive promoter.	GH3; auxin responsive GH3 gene family
	126	Gh_D11G1209	PREDICTED: putative indole-3-acetic acid-amido synthetase GH3.9 isoform X1 [Gossypium raimondii]	GH3 auxin-responsive promoter.	GH3; auxin responsive GH3 gene family
	127	Gh_A01G0776	Indole-3-acetic acid-amido synthetase GH3.17 [Theobroma cacao]	GH3 auxin-responsive promoter.	GH3; auxin responsive GH3 gene family
	128	Gh_A11G1054	PREDICTED: putative indole-3-acetic acid-amido synthetase GH3.9 isoform X1 [Gossypium raimondii]	GH3 auxin-responsive promoter.	GH3; auxin responsive GH3 gene family
	129	Gh_D04G0261	PREDICTED: indole-3-acetic acid-amido synthetase GH3.17-like [Gossypium raimondii]	GH3 auxin-responsive promoter.	GH3; auxin responsive GH3 gene family
	130	Gh_A03G1429	Indole-3-acetic acid-amido synthetase GH3.6 -like protein [Gossypium arboreum]	GH3 auxin-responsive promoter.	GH3; auxin responsive GH3 gene family
	131	Gh_A01G0547	PREDICTED: indole-3-acetic acid-amido synthetase GH3.6 [Gossypium raimondii]	GH3 auxin-responsive promoter.	GH3; auxin responsive GH3 gene family
	132	Gh_A13G0392	PREDICTED: probable indole-3-acetic acid-amido synthetase GH3.1 [Gossypium raimondii]	GH3 auxin-responsive promoter.	GH3; auxin responsive GH3 gene family
	133	Gh_D01G0559	PREDICTED: indole-3-acetic acid-amido synthetase GH3.6 [Gossypium raimondii]	GH3 auxin-responsive promoter.	GH3; auxin responsive GH3 gene family
	134	Gh_D01G0557	PREDICTED: indole-3-acetic acid-amido synthetase GH3.6-like [Gossypium raimondii]	GH3 auxin-responsive promoter.	GH3; auxin responsive GH3 gene family
	135	Gh_A04G0874	Uncharacterized protein F383_23499 [Gossypium arboreum]	GH3 auxin-responsive promoter.	GH3; auxin responsive GH3 gene family
	136	Gh_A01G0546	PREDICTED: indole-3-acetic acid-amido synthetase GH3.6-like [Gossypium raimondii]	GH3 auxin-responsive promoter.	GH3; auxin responsive GH3 gene family
	137	Gh_A05G0871	PREDICTED: protein ETHYLENE INSENSITIVE 3-like [Gossypium raimondii]	Ethylene insensitive 3. Ethylene insensitive 3 (EIN3) proteins are a family of plant DNA-binding proteins that regulate transcription in response to the gaseous plant hormone ethylene, and are essential for ethylene-mediated responses including the triple response, cell growth inhibition, and accelerated senescence.	EIN3; ethylene-insensitive protein 3
	138	Gh_D05G3883	PREDICTED: protein ETHYLENE INSENSITIVE 3-like [Gossypium raimondii]	Ethylene insensitive 3. Ethylene insensitive 3 (EIN3) proteins are a family of plant DNA-binding proteins that regulate transcription in response to the gaseous plant hormone ethylene, and are essential for ethylene-mediated responses including the triple response, cell growth inhibition, and accelerated senescence.	EIN3; ethylene-insensitive protein 3
	139	Gh_D09G0919	PREDICTED: ethylene-insensitive protein 2-like [Gossypium raimondii]	Natural resistance-associated macrophage protein. The natural resistance-associated macrophage protein (NRAMP) family consists of Nramp1, Nramp2, and yeast proteins Smf1 and Smf2. The NRAMP family is a novel family of functional related proteins defined by a conserved hydrophobic core of ten transmembrane domains. This family of membrane proteins are divalent cation transporters. Nramp1 is an int…	EIN2; ethylene-insensitive protein 2
	140	Gh_Sca137957G01	hypothetical protein B456_001G089400 [Gossypium raimondii]	GRAS domain family. Proteins in the GRAS (GAI, RGA, SCR) family are known as major players in gibberellin (GA) signaling, which regulates various aspects of plant growth and development. Mutation of the SCARECROW (SCR) gene results in a radial pattern defect, loss of a ground tissue layer, in the root. The PAT1 protein is involved in phytochrome A signal transduction. A sequence, structure and ev…	DELLA; DELLA protein
	141	Gh_D02G0587	PREDICTED: DELLA protein RGL2-like [Gossypium raimondii]	GRAS domain family. Proteins in the GRAS (GAI, RGA, SCR) family are known as major players in gibberellin (GA) signaling, which regulates various aspects of plant growth and development. Mutation of the SCARECROW (SCR) gene results in a radial pattern defect, loss of a ground tissue layer, in the root. The PAT1 protein is involved in phytochrome A signal transduction. A sequence, structure and ev…	DELLA; DELLA protein
	142	Gh_D05G0197	GAI/RGA-like 3-a [Gossypium hirsutum]	GRAS domain family. Proteins in the GRAS (GAI, RGA, SCR) family are known as major players in gibberellin (GA) signaling, which regulates various aspects of plant growth and development. Mutation of the SCARECROW (SCR) gene results in a radial pattern defect, loss of a ground tissue layer, in the root. The PAT1 protein is involved in phytochrome A signal transduction. A sequence, structure and ev…	DELLA; DELLA protein
	143	Gh_A05G0135	GAI/RGA-like 3-b [Gossypium hirsutum]	GRAS domain family. Proteins in the GRAS (GAI, RGA, SCR) family are known as major players in gibberellin (GA) signaling, which regulates various aspects of plant growth and development. Mutation of the SCARECROW (SCR) gene results in a radial pattern defect, loss of a ground tissue layer, in the root. The PAT1 protein is involved in phytochrome A signal transduction. A sequence, structure and ev…	DELLA; DELLA protein
	144	Gh_D12G0686	PREDICTED: cyclin-D3-3-like [Gossypium raimondii]	Cyclin, N-terminal domain. Cyclins regulate cyclin dependent kinases (CDKs). Human cyclin-O is a Uracil-DNA glycosylase that is related to other cyclins. Cyclins contain two domains of similar all-alpha fold, of which this family corresponds with the N-terminal domain.	CYCD3; cyclin D3, plant
	145	Gh_A02G1483	Cyclin-D3-2 -like protein [Gossypium arboreum]	Cyclin, N-terminal domain. Cyclins regulate cyclin dependent kinases (CDKs). Human cyclin-O is a Uracil-DNA glycosylase that is related to other cyclins. Cyclins contain two domains of similar all-alpha fold, of which this family corresponds with the N-terminal domain.	CYCD3; cyclin D3, plant
	146	Gh_A05G1783	PREDICTED: cyclin-D3-1-like [Gossypium raimondii]	Cyclin, N-terminal domain. Cyclins regulate cyclin dependent kinases (CDKs). Human cyclin-O is a Uracil-DNA glycosylase that is related to other cyclins. Cyclins contain two domains of similar all-alpha fold, of which this family corresponds with the N-terminal domain.	CYCD3; cyclin D3, plant
	147	Gh_A03G1646	PREDICTED: cyclin-D3-1 [Gossypium raimondii]	Cyclin, N-terminal domain. Cyclins regulate cyclin dependent kinases (CDKs). Human cyclin-O is a Uracil-DNA glycosylase that is related to other cyclins. Cyclins contain two domains of similar all-alpha fold, of which this family corresponds with the N-terminal domain.	CYCD3; cyclin D3, plant
	148	Gh_D10G0941	PREDICTED: cyclin-D3-3-like isoform X1 [Gossypium raimondii]	Cyclin, N-terminal domain. Cyclins regulate cyclin dependent kinases (CDKs). Human cyclin-O is a Uracil-DNA glycosylase that is related to other cyclins. Cyclins contain two domains of similar all-alpha fold, of which this family corresponds with the N-terminal domain.	CYCD3; cyclin D3, plant
	149	Gh_A12G0677	hypothetical protein B456_008G078400 [Gossypium raimondii]	Cyclin, N-terminal domain. Cyclins regulate cyclin dependent kinases (CDKs). Human cyclin-O is a Uracil-DNA glycosylase that is related to other cyclins. Cyclins contain two domains of similar all-alpha fold, of which this family corresponds with the N-terminal domain.	CYCD3; cyclin D3, plant
	150	Gh_D13G0418	PREDICTED: cyclin-D3-1-like [Gossypium raimondii]	Cyclin, N-terminal domain. Cyclins regulate cyclin dependent kinases (CDKs). Human cyclin-O is a Uracil-DNA glycosylase that is related to other cyclins. Cyclins contain two domains of similar all-alpha fold, of which this family corresponds with the N-terminal domain.	CYCD3; cyclin D3, plant
	151	Gh_D02G2062	PREDICTED: cyclin-D3-1 [Gossypium raimondii]	Cyclin, N-terminal domain. Cyclins regulate cyclin dependent kinases (CDKs). Human cyclin-O is a Uracil-DNA glycosylase that is related to other cyclins. Cyclins contain two domains of similar all-alpha fold, of which this family corresponds with the N-terminal domain.	CYCD3; cyclin D3, plant
	152	Gh_A04G1027	PREDICTED: cyclin-D3-1-like [Gossypium raimondii]	Cyclin, N-terminal domain. Cyclins regulate cyclin dependent kinases (CDKs). Human cyclin-O is a Uracil-DNA glycosylase that is related to other cyclins. Cyclins contain two domains of similar all-alpha fold, of which this family corresponds with the N-terminal domain.	CYCD3; cyclin D3, plant
	153	Gh_D03G0231	hypothetical protein B456_003G027100 [Gossypium raimondii]	Cyclin, N-terminal domain. Cyclins regulate cyclin dependent kinases (CDKs). Human cyclin-O is a Uracil-DNA glycosylase that is related to other cyclins. Cyclins contain two domains of similar all-alpha fold, of which this family corresponds with the N-terminal domain.	CYCD3; cyclin D3, plant
	154	Gh_D01G1042	PREDICTED: cyclin-D3-3-like [Gossypium raimondii]	Cyclin, N-terminal domain. Cyclins regulate cyclin dependent kinases (CDKs). Human cyclin-O is a Uracil-DNA glycosylase that is related to other cyclins. Cyclins contain two domains of similar all-alpha fold, of which this family corresponds with the N-terminal domain.	CYCD3; cyclin D3, plant
	155	Gh_A10G0818	PREDICTED: cyclin-D3-3-like isoform X1 [Gossypium raimondii]	Cyclin, N-terminal domain. Cyclins regulate cyclin dependent kinases (CDKs). Human cyclin-O is a Uracil-DNA glycosylase that is related to other cyclins. Cyclins contain two domains of similar all-alpha fold, of which this family corresponds with the N-terminal domain.	CYCD3; cyclin D3, plant
	156	Gh_D02G0899	hypothetical protein B456_005G101100 [Gossypium raimondii]	Cyclin, N-terminal domain. Cyclins regulate cyclin dependent kinases (CDKs). Human cyclin-O is a Uracil-DNA glycosylase that is related to other cyclins. Cyclins contain two domains of similar all-alpha fold, of which this family corresponds with the N-terminal domain.	CYCD3; cyclin D3, plant
	157	Gh_D05G1978	PREDICTED: cyclin-D3-1-like [Gossypium raimondii]	Cyclin, N-terminal domain. Cyclins regulate cyclin dependent kinases (CDKs). Human cyclin-O is a Uracil-DNA glycosylase that is related to other cyclins. Cyclins contain two domains of similar all-alpha fold, of which this family corresponds with the N-terminal domain.	CYCD3; cyclin D3, plant
	158	Gh_A02G0849	Cyclin-D3-1 -like protein [Gossypium arboreum]	Cyclin, N-terminal domain. Cyclins regulate cyclin dependent kinases (CDKs). Human cyclin-O is a Uracil-DNA glycosylase that is related to other cyclins. Cyclins contain two domains of similar all-alpha fold, of which this family corresponds with the N-terminal domain.	CYCD3; cyclin D3, plant
	159	Gh_D02G0731	PREDICTED: coronatine-insensitive protein 1-like [Gossypium raimondii]	F-box-like. This is an F-box-like family.	COI-1; coronatine-insensitive protein 1
	160	Gh_A03G1024	PREDICTED: protein BRASSINAZOLE-RESISTANT 1-like [Gossypium raimondii]	Plant protein of unknown function (DUF822). This family consists of the N terminal regions of several plant proteins of unknown function.	BZR1_2; brassinosteroid resistant 1/2
	161	Gh_D02G0939	PREDICTED: protein BRASSINAZOLE-RESISTANT 1-like [Gossypium raimondii]	Plant protein of unknown function (DUF822). This family consists of the N terminal regions of several plant proteins of unknown function.	BZR1_2; brassinosteroid resistant 1/2
	162	Gh_A07G0927	hypothetical protein F383_27880 [Gossypium arboreum]	Protein of unknown function (DUF1193). This family represents the C-terminus of several hypothetical eukaryotic proteins of unknown function. Family members contain two conserved motifs: DRHHYE and QCC, as well as a number of conserved cysteine residues.	BSK; BR-signaling kinase [EC:2.7.11.1]
	163	Gh_A07G0928	hypothetical protein F383_27880 [Gossypium arboreum]	TPR repeat.	BSK; BR-signaling kinase [EC:2.7.11.1]
	164	Gh_A10G2189	hypothetical protein F383_01426 [Gossypium arboreum]	Protein kinase domain.	BSK; BR-signaling kinase [EC:2.7.11.1]
	165	Gh_D09G1529	PREDICTED: probable serine/threonine-protein kinase At5g41260 isoform X1 [Gossypium raimondii]	Protein kinase domain.	BSK; BR-signaling kinase [EC:2.7.11.1]
	166	Gh_D05G0899	PREDICTED: probable serine/threonine-protein kinase At5g41260 [Gossypium raimondii]	Protein kinase domain.	BSK; BR-signaling kinase [EC:2.7.11.1]
	167	Gh_A05G0768	PREDICTED: probable serine/threonine-protein kinase At5g41260 [Gossypium raimondii]	Protein kinase domain.	BSK; BR-signaling kinase [EC:2.7.11.1]
	168	Gh_A01G1928	PREDICTED: probable serine/threonine-protein kinase At5g41260 [Gossypium raimondii]	Protein kinase domain.	BSK; BR-signaling kinase [EC:2.7.11.1]
	169	Gh_A03G0393	hypothetical protein B456_003G126600 [Gossypium raimondii]	Protein kinase domain.	BSK; BR-signaling kinase [EC:2.7.11.1]
	170	Gh_A03G0392	hypothetical protein B456_003G126600 [Gossypium raimondii]	Protein tyrosine kinase.	BSK; BR-signaling kinase [EC:2.7.11.1]
	171	Gh_D03G1147	hypothetical protein B456_003G126600 [Gossypium raimondii]	Tetratricopeptide repeat.	BSK; BR-signaling kinase [EC:2.7.11.1]
	172	Gh_D03G1148	PREDICTED: probable serine/threonine-protein kinase At5g41260 [Gossypium raimondii]	Protein kinase domain.	BSK; BR-signaling kinase [EC:2.7.11.1]
	173	Gh_D01G2185	PREDICTED: probable serine/threonine-protein kinase At5g41260 [Gossypium raimondii]	Protein kinase domain.	BSK; BR-signaling kinase [EC:2.7.11.1]
	174	Gh_D11G2243	PREDICTED: protein BRASSINOSTEROID INSENSITIVE 1-like [Gossypium raimondii]	Protein kinase domain.	BRI1; protein brassinosteroid insensitive 1 [EC:2.7.10.1 2.7.11.1]
	175	Gh_D03G0445	PREDICTED: protein BRASSINOSTEROID INSENSITIVE 1-like [Gossypium raimondii]	Protein kinase domain.	BRI1; protein brassinosteroid insensitive 1 [EC:2.7.10.1 2.7.11.1]
	176	Gh_A11G3159	PREDICTED: protein BRASSINOSTEROID INSENSITIVE 1-like [Gossypium raimondii]	Protein kinase domain.	BRI1; protein brassinosteroid insensitive 1 [EC:2.7.10.1 2.7.11.1]
	177	Gh_A05G1738	PREDICTED: BRI1 kinase inhibitor 1-like [Gossypium raimondii]	Protein of unknown function (DUF499). Family of uncharacterized hypothetical prokaryotic proteins.	BKI1; BRI1 kinase inhibitor 1
	178	Gh_D05G1933	PREDICTED: BRI1 kinase inhibitor 1-like [Gossypium raimondii]	Protein of unknown function (DUF499). Family of uncharacterized hypothetical prokaryotic proteins.	BKI1; BRI1 kinase inhibitor 1
	179	Gh_A01G0972	PREDICTED: BRI1 kinase inhibitor 1-like [Gossypium raimondii]	E3 ubiquitin-protein ligase UBR4. This is a family of E## ubiquitin ligase enzymes.	BKI1; BRI1 kinase inhibitor 1
	180	Gh_D01G1023	PREDICTED: BRI1 kinase inhibitor 1-like [Gossypium raimondii]	Protein of unknown function (DUF2578). This is a Saccharomycete family of proteins with unknown function. The protein in S. cerevisiae is strongly induced in response to many stress conditions and is repressed in drug resistant yeast strains.	BKI1; BRI1 kinase inhibitor 1
	181	Gh_A13G0149	PREDICTED: auxin transporter-like protein 2 [Gossypium raimondii]	Transmembrane amino acid transporter protein. This transmembrane region is found in many amino acid transporters including UNC-47 and MTR. UNC-47 encodes a vesicular amino butyric acid (GABA) transporter, (VGAT). UNC-47 is predicted to have 10 transmembrane domains. MTR is a N system amino acid transporter system protein involved in methyltryptophan resistance. Other members of this family includ…	AUX1, LAX; auxin influx carrier (AUX1 LAX family)
	182	Gh_D13G0171	PREDICTED: auxin transporter-like protein 2 [Gossypium raimondii]	Transmembrane amino acid transporter protein. This transmembrane region is found in many amino acid transporters including UNC-47 and MTR. UNC-47 encodes a vesicular amino butyric acid (GABA) transporter, (VGAT). UNC-47 is predicted to have 10 transmembrane domains. MTR is a N system amino acid transporter system protein involved in methyltryptophan resistance. Other members of this family includ…	AUX1, LAX; auxin influx carrier (AUX1 LAX family)
	183	Gh_D04G0646	PREDICTED: auxin transporter-like protein 2 isoform X1 [Gossypium raimondii]	Transmembrane amino acid transporter protein. This transmembrane region is found in many amino acid transporters including UNC-47 and MTR. UNC-47 encodes a vesicular amino butyric acid (GABA) transporter, (VGAT). UNC-47 is predicted to have 10 transmembrane domains. MTR is a N system amino acid transporter system protein involved in methyltryptophan resistance. Other members of this family includ…	AUX1, LAX; auxin influx carrier (AUX1 LAX family)
	184	Gh_A01G1955	Auxin transporter-like protein 2 [Gossypium arboreum]	Transmembrane amino acid transporter protein. This transmembrane region is found in many amino acid transporters including UNC-47 and MTR. UNC-47 encodes a vesicular amino butyric acid (GABA) transporter, (VGAT). UNC-47 is predicted to have 10 transmembrane domains. MTR is a N system amino acid transporter system protein involved in methyltryptophan resistance. Other members of this family includ…	AUX1, LAX; auxin influx carrier (AUX1 LAX family)
	185	Gh_A09G1530	PREDICTED: auxin transporter-like protein 2 [Gossypium raimondii]	Transmembrane amino acid transporter protein. This transmembrane region is found in many amino acid transporters including UNC-47 and MTR. UNC-47 encodes a vesicular amino butyric acid (GABA) transporter, (VGAT). UNC-47 is predicted to have 10 transmembrane domains. MTR is a N system amino acid transporter system protein involved in methyltryptophan resistance. Other members of this family includ…	AUX1, LAX; auxin influx carrier (AUX1 LAX family)
	186	Gh_D10G2366	PREDICTED: auxin transporter-like protein 2 isoform X1 [Gossypium raimondii]	Transmembrane amino acid transporter protein. This transmembrane region is found in many amino acid transporters including UNC-47 and MTR. UNC-47 encodes a vesicular amino butyric acid (GABA) transporter, (VGAT). UNC-47 is predicted to have 10 transmembrane domains. MTR is a N system amino acid transporter system protein involved in methyltryptophan resistance. Other members of this family includ…	AUX1, LAX; auxin influx carrier (AUX1 LAX family)
	187	Gh_D09G1548	PREDICTED: auxin transporter-like protein 2 [Gossypium raimondii]	Transmembrane amino acid transporter protein. This transmembrane region is found in many amino acid transporters including UNC-47 and MTR. UNC-47 encodes a vesicular amino butyric acid (GABA) transporter, (VGAT). UNC-47 is predicted to have 10 transmembrane domains. MTR is a N system amino acid transporter system protein involved in methyltryptophan resistance. Other members of this family includ…	AUX1, LAX; auxin influx carrier (AUX1 LAX family)
	188	Gh_D06G0382	hypothetical protein B456_010G048200 [Gossypium raimondii]	Transmembrane amino acid transporter protein. This transmembrane region is found in many amino acid transporters including UNC-47 and MTR. UNC-47 encodes a vesicular amino butyric acid (GABA) transporter, (VGAT). UNC-47 is predicted to have 10 transmembrane domains. MTR is a N system amino acid transporter system protein involved in methyltryptophan resistance. Other members of this family includ…	AUX1, LAX; auxin influx carrier (AUX1 LAX family)
	189	Gh_A10G2096	PREDICTED: auxin transporter-like protein 2 isoform X1 [Gossypium raimondii]	Transmembrane amino acid transporter protein. This transmembrane region is found in many amino acid transporters including UNC-47 and MTR. UNC-47 encodes a vesicular amino butyric acid (GABA) transporter, (VGAT). UNC-47 is predicted to have 10 transmembrane domains. MTR is a N system amino acid transporter system protein involved in methyltryptophan resistance. Other members of this family includ…	AUX1, LAX; auxin influx carrier (AUX1 LAX family)
	190	Gh_D01G2215	PREDICTED: auxin transporter-like protein 2 [Gossypium raimondii]	Transmembrane amino acid transporter protein. This transmembrane region is found in many amino acid transporters including UNC-47 and MTR. UNC-47 encodes a vesicular amino butyric acid (GABA) transporter, (VGAT). UNC-47 is predicted to have 10 transmembrane domains. MTR is a N system amino acid transporter system protein involved in methyltryptophan resistance. Other members of this family includ…	AUX1, LAX; auxin influx carrier (AUX1 LAX family)
	191	Gh_A06G0351	hypothetical protein B456_010G048200 [Gossypium raimondii]	Transmembrane amino acid transporter protein. This transmembrane region is found in many amino acid transporters including UNC-47 and MTR. UNC-47 encodes a vesicular amino butyric acid (GABA) transporter, (VGAT). UNC-47 is predicted to have 10 transmembrane domains. MTR is a N system amino acid transporter system protein involved in methyltryptophan resistance. Other members of this family includ…	AUX1, LAX; auxin influx carrier (AUX1 LAX family)
	192	Gh_D02G1568	PREDICTED: two-component response regulator ARR11 [Gossypium raimondii]	Response regulator receiver domain. This domain receives the signal from the sensor partner in bacterial two-component systems. It is usually found N-terminal to a DNA binding effector domain.	ARR-B; two-component response regulator ARR-B family
	193	Gh_A13G2133	PREDICTED: uncharacterized protein LOC105784055 [Gossypium raimondii]	Myb-like DNA-binding domain. This family contains the DNA binding domains from Myb proteins, as well as the SANT domain family.	ARR-B; two-component response regulator ARR-B family
	194	Gh_D04G1594	PREDICTED: kinesin-like protein KIF21A [Gossypium raimondii]	Myb-like DNA-binding domain. This family contains the DNA binding domains from Myb proteins, as well as the SANT domain family.	ARR-B; two-component response regulator ARR-B family
	195	Gh_D05G0524	PREDICTED: two-component response regulator ARR12 [Gossypium raimondii]	Response regulator receiver domain. This domain receives the signal from the sensor partner in bacterial two-component systems. It is usually found N-terminal to a DNA binding effector domain.	ARR-B; two-component response regulator ARR-B family
	196	Gh_D13G0720	PREDICTED: uncharacterized protein LOC105784055 [Gossypium raimondii]	Myb-like DNA-binding domain. This family contains the DNA binding domains from Myb proteins, as well as the SANT domain family.	ARR-B; two-component response regulator ARR-B family
	197	Gh_A03G1136	Two-component response regulator ARR11 -like protein [Gossypium arboreum]	Response regulator receiver domain. This domain receives the signal from the sensor partner in bacterial two-component systems. It is usually found N-terminal to a DNA binding effector domain.	ARR-B; two-component response regulator ARR-B family
	198	Gh_D13G1951	PREDICTED: two-component response regulator ARR12-like isoform X1 [Gossypium raimondii]	Response regulator receiver domain. This domain receives the signal from the sensor partner in bacterial two-component systems. It is usually found N-terminal to a DNA binding effector domain.	ARR-B; two-component response regulator ARR-B family
	199	Gh_D10G1750	PREDICTED: two-component response regulator ARR2-like isoform X1 [Gossypium raimondii]	Response regulator receiver domain. This domain receives the signal from the sensor partner in bacterial two-component systems. It is usually found N-terminal to a DNA binding effector domain.	ARR-B; two-component response regulator ARR-B family
	200	Gh_A12G0642	Two-component response regulator ARR1 -like protein [Gossypium arboreum]	Myb-like DNA-binding domain. This family contains the DNA binding domains from Myb proteins, as well as the SANT domain family.	ARR-B; two-component response regulator ARR-B family
	201	Gh_A09G2069	Two-component response regulator ARR1 -like protein [Gossypium arboreum]	Response regulator receiver domain. This domain receives the signal from the sensor partner in bacterial two-component systems. It is usually found N-terminal to a DNA binding effector domain.	ARR-B; two-component response regulator ARR-B family
	202	Gh_A10G1504	Two-component response regulator ARR1 -like protein [Gossypium arboreum]	Response regulator receiver domain. This domain receives the signal from the sensor partner in bacterial two-component systems. It is usually found N-terminal to a DNA binding effector domain.	ARR-B; two-component response regulator ARR-B family
	203	Gh_D03G0185	PREDICTED: probable transcription factor KAN3 [Gossypium raimondii]	Myb-like DNA-binding domain. This family contains the DNA binding domains from Myb proteins, as well as the SANT domain family.	ARR-B; two-component response regulator ARR-B family
	204	Gh_D12G0857	PREDICTED: uncharacterized protein LOC105763342 [Gossypium raimondii]	Myb-like DNA-binding domain. This family contains the DNA binding domains from Myb proteins, as well as the SANT domain family.	ARR-B; two-component response regulator ARR-B family
	205	Gh_D09G2246	Histidine-containing phosphotransfer 1 -like protein [Gossypium arboreum]	Hpt domain. The histidine-containing phosphotransfer (HPt) domain is a novel protein module with an active histidine residue that mediates phosphotransfer reactions in the two-component signaling systems. A multistep phosphorelay involving the HPt domain has been suggested for these signaling pathways. The crystal structure of the HPt domain of the anaerobic sensor kinase ArcB has been determined…	AHP; histidine-containing phosphotransfer peotein
	206	Gh_A07G1748	hypothetical protein B456_008G006900 [Gossypium raimondii]	Transmembrane protein. This entry is a highly conserved protein present in eukaryotes.	AHP; histidine-containing phosphotransfer peotein
	207	Gh_A13G1519	PREDICTED: histidine-containing phosphotransfer protein 1-like [Gossypium raimondii]	Hpt domain. The histidine-containing phosphotransfer (HPt) domain is a novel protein module with an active histidine residue that mediates phosphotransfer reactions in the two-component signaling systems. A multistep phosphorelay involving the HPt domain has been suggested for these signaling pathways. The crystal structure of the HPt domain of the anaerobic sensor kinase ArcB has been determined…	AHP; histidine-containing phosphotransfer peotein
	208	Gh_D11G2680	PREDICTED: histidine-containing phosphotransfer protein 1-like [Gossypium raimondii]	Hpt domain. The histidine-containing phosphotransfer (HPt) domain is a novel protein module with an active histidine residue that mediates phosphotransfer reactions in the two-component signaling systems. A multistep phosphorelay involving the HPt domain has been suggested for these signaling pathways. The crystal structure of the HPt domain of the anaerobic sensor kinase ArcB has been determined…	AHP; histidine-containing phosphotransfer peotein
	209	Gh_A11G2364	Histidine-containing phosphotransfer 5 -like protein [Gossypium arboreum]	Hpt domain. The histidine-containing phosphotransfer (HPt) domain is a novel protein module with an active histidine residue that mediates phosphotransfer reactions in the two-component signaling systems. A multistep phosphorelay involving the HPt domain has been suggested for these signaling pathways. The crystal structure of the HPt domain of the anaerobic sensor kinase ArcB has been determined…	AHP; histidine-containing phosphotransfer peotein
	210	Gh_D13G1848	PREDICTED: histidine-containing phosphotransfer protein 1-like [Gossypium raimondii]	Hpt domain. The histidine-containing phosphotransfer (HPt) domain is a novel protein module with an active histidine residue that mediates phosphotransfer reactions in the two-component signaling systems. A multistep phosphorelay involving the HPt domain has been suggested for these signaling pathways. The crystal structure of the HPt domain of the anaerobic sensor kinase ArcB has been determined…	AHP; histidine-containing phosphotransfer peotein
	211	Gh_D01G1500	PREDICTED: histidine kinase 3-like isoform X2 [Gossypium raimondii]	CHASE domain. This domain is found in the extracellular portion of receptor-like proteins - such as serine/threonine kinases and adenylyl cyclases. Predicted to be a ligand binding domain.	AHK2_3_4; arabidopsis histidine kinase 2/3/4 (cytokinin receptor) [EC:2.7.13.3]
	212	Gh_D07G1665	PREDICTED: histidine kinase 2-like isoform X2 [Gossypium raimondii]	CHASE domain. This domain is found in the extracellular portion of receptor-like proteins - such as serine/threonine kinases and adenylyl cyclases. Predicted to be a ligand binding domain.	AHK2_3_4; arabidopsis histidine kinase 2/3/4 (cytokinin receptor) [EC:2.7.13.3]
	213	Gh_A11G1389	PREDICTED: histidine kinase 2 isoform X3 [Gossypium raimondii]	CHASE domain. This domain is found in the extracellular portion of receptor-like proteins - such as serine/threonine kinases and adenylyl cyclases. Predicted to be a ligand binding domain.	AHK2_3_4; arabidopsis histidine kinase 2/3/4 (cytokinin receptor) [EC:2.7.13.3]
	214	Gh_A07G1520	Histidine kinase 2 -like protein [Gossypium arboreum]	CHASE domain. This domain is found in the extracellular portion of receptor-like proteins - such as serine/threonine kinases and adenylyl cyclases. Predicted to be a ligand binding domain.	AHK2_3_4; arabidopsis histidine kinase 2/3/4 (cytokinin receptor) [EC:2.7.13.3]
	215	Gh_D02G1369	hypothetical protein B456_005G153000 [Gossypium raimondii]	CHASE domain. This domain is found in the extracellular portion of receptor-like proteins - such as serine/threonine kinases and adenylyl cyclases. Predicted to be a ligand binding domain.	AHK2_3_4; arabidopsis histidine kinase 2/3/4 (cytokinin receptor) [EC:2.7.13.3]
	216	Gh_D02G1509	Histidine kinase 3 -like protein [Gossypium arboreum]	CHASE domain. This domain is found in the extracellular portion of receptor-like proteins - such as serine/threonine kinases and adenylyl cyclases. Predicted to be a ligand binding domain.	AHK2_3_4; arabidopsis histidine kinase 2/3/4 (cytokinin receptor) [EC:2.7.13.3]
	217	Gh_D11G1534	PREDICTED: histidine kinase 2 isoform X3 [Gossypium raimondii]	CHASE domain. This domain is found in the extracellular portion of receptor-like proteins - such as serine/threonine kinases and adenylyl cyclases. Predicted to be a ligand binding domain.	AHK2_3_4; arabidopsis histidine kinase 2/3/4 (cytokinin receptor) [EC:2.7.13.3]
	218	Gh_A03G0984	Histidine kinase 4 [Gossypium arboreum]	CHASE domain. This domain is found in the extracellular portion of receptor-like proteins - such as serine/threonine kinases and adenylyl cyclases. Predicted to be a ligand binding domain.	AHK2_3_4; arabidopsis histidine kinase 2/3/4 (cytokinin receptor) [EC:2.7.13.3]
	219	Gh_A03G0983	Histidine kinase 4 [Gossypium arboreum]	Response regulator receiver domain. This domain receives the signal from the sensor partner in bacterial two-component systems. It is usually found N-terminal to a DNA binding effector domain.	AHK2_3_4; arabidopsis histidine kinase 2/3/4 (cytokinin receptor) [EC:2.7.13.3]
	220	Gh_D02G2079	PREDICTED: ABSCISIC ACID-INSENSITIVE 5-like protein 6 isoform X1 [Gossypium raimondii]	bZIP transcription factor. The Pfam entry includes the basic region and the leucine zipper region.	ABF; ABA responsive element binding factor
	221	Gh_A10G0797	Auxin-responsive IAA9 -like protein [Gossypium arboreum]	AUX/IAA family. Transcription of the AUX/IAA family of genes is rapidly induced by the plant hormone auxin. Some members of this family are longer and contain an N terminal DNA binding domain. The function of this region is uncertain.	.
	222	Gh_D02G2104	Serine/threonine-protein kinase SRK2E [Gossypium arboreum]	Protein kinase domain.	.
	223	Gh_A05G3764	PREDICTED: auxin-responsive protein IAA8-like [Gossypium raimondii]	AUX/IAA family. Transcription of the AUX/IAA family of genes is rapidly induced by the plant hormone auxin. Some members of this family are longer and contain an N terminal DNA binding domain. The function of this region is uncertain.	.
	224	Gh_A11G1231	auxin-responsive protein [Gossypium hirsutum]	AUX/IAA family. Transcription of the AUX/IAA family of genes is rapidly induced by the plant hormone auxin. Some members of this family are longer and contain an N terminal DNA binding domain. The function of this region is uncertain.	.
	225	Gh_D08G2060	auxin-responsive protein [Gossypium hirsutum]	AUX/IAA family. Transcription of the AUX/IAA family of genes is rapidly induced by the plant hormone auxin. Some members of this family are longer and contain an N terminal DNA binding domain. The function of this region is uncertain.	.
	226	Gh_D11G1377	PREDICTED: auxin-responsive protein IAA11-like [Gossypium raimondii]	AUX/IAA family. Transcription of the AUX/IAA family of genes is rapidly induced by the plant hormone auxin. Some members of this family are longer and contain an N terminal DNA binding domain. The function of this region is uncertain.	.
	227	Gh_A06G0239	auxin-responsive protein [Gossypium hirsutum]	AUX/IAA family. Transcription of the AUX/IAA family of genes is rapidly induced by the plant hormone auxin. Some members of this family are longer and contain an N terminal DNA binding domain. The function of this region is uncertain.	.
	228	Gh_A04G0959	PREDICTED: BRASSINOSTEROID INSENSITIVE 1-associated receptor kinase 1-like isoform X2 [Gossypium raimondii]	Protein kinase domain.	.
	229	Gh_D01G1757	PREDICTED: basic form of pathogenesis-related protein 1 [Gossypium raimondii]	Cysteine-rich secretory protein family. This is a large family of cysteine-rich secretory proteins, antigen 5, and pathogenesis-related 1 proteins (CAP) that are found in a wide range of organisms, including prokaryotes and non-vertebrate eukaryotes, The nine subfamilies of the mammalian CAP 'super'family include: the human glioma pathogenesis-related 1 (GLIPR1), Golgi associated pathogenesis rel…	.
	230	Gh_A10G0577	PREDICTED: histidine-containing phosphotransfer protein 4-like [Gossypium raimondii]	Hpt domain. The histidine-containing phosphotransfer (HPt) domain is a novel protein module with an active histidine residue that mediates phosphotransfer reactions in the two-component signaling systems. A multistep phosphorelay involving the HPt domain has been suggested for these signaling pathways. The crystal structure of the HPt domain of the anaerobic sensor kinase ArcB has been determined…	.
	231	Gh_A08G1702	PREDICTED: auxin-responsive protein IAA11-like [Gossypium raimondii]	AUX/IAA family. Transcription of the AUX/IAA family of genes is rapidly induced by the plant hormone auxin. Some members of this family are longer and contain an N terminal DNA binding domain. The function of this region is uncertain.	.
	232	Gh_D10G1858	PREDICTED: two-component response regulator ARR17-like [Gossypium raimondii]	Response regulator receiver domain. This domain receives the signal from the sensor partner in bacterial two-component systems. It is usually found N-terminal to a DNA binding effector domain.	.
	233	Gh_D06G2142	PREDICTED: shaggy-related protein kinase eta [Gossypium raimondii]	Protein kinase domain.	.
	234	Gh_A08G0301	PREDICTED: auxin-induced protein X15-like [Gossypium raimondii]	Auxin responsive protein. This family consists of the protein products of the ARG7 auxin responsive genes family none of which have any identified functional role.	.
	235	Gh_A03G1804	PREDICTED: auxin transporter-like protein 2 [Gossypium raimondii]	Transmembrane amino acid transporter protein. This transmembrane region is found in many amino acid transporters including UNC-47 and MTR. UNC-47 encodes a vesicular amino butyric acid (GABA) transporter, (VGAT). UNC-47 is predicted to have 10 transmembrane domains. MTR is a N system amino acid transporter system protein involved in methyltryptophan resistance. Other members of this family includ…	.
	236	Gh_A10G1603	PREDICTED: two-component response regulator ARR17-like [Gossypium raimondii]	Response regulator receiver domain. This domain receives the signal from the sensor partner in bacterial two-component systems. It is usually found N-terminal to a DNA binding effector domain.	.
	237	Gh_D02G2237	PREDICTED: auxin transporter-like protein 2 [Gossypium raimondii]	Transmembrane amino acid transporter protein. This transmembrane region is found in many amino acid transporters including UNC-47 and MTR. UNC-47 encodes a vesicular amino butyric acid (GABA) transporter, (VGAT). UNC-47 is predicted to have 10 transmembrane domains. MTR is a N system amino acid transporter system protein involved in methyltryptophan resistance. Other members of this family includ…	.
	238	Gh_A13G0027	PREDICTED: transcription factor TGA2-like isoform X1 [Gossypium raimondii]	Seed dormancy control. This family of plant proteins appears to be a highly specific controller seed dormancy.	.
	239	Gh_D06G2318	PREDICTED: auxin-responsive protein IAA9-like isoform X1 [Gossypium raimondii]	AUX/IAA family. Transcription of the AUX/IAA family of genes is rapidly induced by the plant hormone auxin. Some members of this family are longer and contain an N terminal DNA binding domain. The function of this region is uncertain.	.
	240	Gh_A01G1374	PREDICTED: auxin transporter-like protein 5 [Gossypium raimondii]	Transmembrane amino acid transporter protein. This transmembrane region is found in many amino acid transporters including UNC-47 and MTR. UNC-47 encodes a vesicular amino butyric acid (GABA) transporter, (VGAT). UNC-47 is predicted to have 10 transmembrane domains. MTR is a N system amino acid transporter system protein involved in methyltryptophan resistance. Other members of this family includ…	.
	241	Gh_D09G1854	PREDICTED: uncharacterized protein LOC105765114 [Gossypium raimondii]	Auxin responsive protein. This family consists of the protein products of the ARG7 auxin responsive genes family none of which have any identified functional role.	.
	242	Gh_D01G1617	PREDICTED: auxin transporter-like protein 5 [Gossypium raimondii]	Transmembrane amino acid transporter protein. This transmembrane region is found in many amino acid transporters including UNC-47 and MTR. UNC-47 encodes a vesicular amino butyric acid (GABA) transporter, (VGAT). UNC-47 is predicted to have 10 transmembrane domains. MTR is a N system amino acid transporter system protein involved in methyltryptophan resistance. Other members of this family includ…	.
	243	Gh_Sca005244G02	PREDICTED: histidine-containing phosphotransfer protein 4 [Gossypium raimondii]	Hpt domain. The histidine-containing phosphotransfer (HPt) domain is a novel protein module with an active histidine residue that mediates phosphotransfer reactions in the two-component signaling systems. A multistep phosphorelay involving the HPt domain has been suggested for these signaling pathways. The crystal structure of the HPt domain of the anaerobic sensor kinase ArcB has been determined…	.
	244	Gh_A06G2020	hypothetical protein B456_010G241600 [Gossypium raimondii]	Protein kinase domain.	.
	245	Gh_A10G1613	PREDICTED: two-component response regulator ARR17 [Gossypium raimondii]	Response regulator receiver domain. This domain receives the signal from the sensor partner in bacterial two-component systems. It is usually found N-terminal to a DNA binding effector domain.	.
	246	Gh_D05G0473	PREDICTED: histidine-containing phosphotransfer protein 4-like isoform X1 [Gossypium raimondii]	Hpt domain. The histidine-containing phosphotransfer (HPt) domain is a novel protein module with an active histidine residue that mediates phosphotransfer reactions in the two-component signaling systems. A multistep phosphorelay involving the HPt domain has been suggested for these signaling pathways. The crystal structure of the HPt domain of the anaerobic sensor kinase ArcB has been determined…	.
	247	Gh_D08G0393	PREDICTED: auxin-induced protein X15-like [Gossypium raimondii]	Auxin responsive protein. This family consists of the protein products of the ARG7 auxin responsive genes family none of which have any identified functional role.	.
	248	Gh_D10G0965	PREDICTED: auxin-responsive protein IAA9-like isoform X1 [Gossypium raimondii]	AUX/IAA family. Transcription of the AUX/IAA family of genes is rapidly induced by the plant hormone auxin. Some members of this family are longer and contain an N terminal DNA binding domain. The function of this region is uncertain.	.
	249	Gh_D05G0822	PREDICTED: transcription factor HBP-1b(c38)-like isoform X1 [Gossypium raimondii]	Seed dormancy control. This family of plant proteins appears to be a highly specific controller seed dormancy.	.
	250	Gh_A05G0357	Histidine-containing phosphotransfer 4 -like protein [Gossypium arboreum]	Hpt domain. The histidine-containing phosphotransfer (HPt) domain is a novel protein module with an active histidine residue that mediates phosphotransfer reactions in the two-component signaling systems. A multistep phosphorelay involving the HPt domain has been suggested for these signaling pathways. The crystal structure of the HPt domain of the anaerobic sensor kinase ArcB has been determined…	.
