# Supplementary material for: Low Temperature Inhibits the Defoliation Efficiency of Thidiazuron in Cotton by Regulating Plant Hormone Synthesis and the Signaling Pathway
Source: Int J Mol Sci. 2022 Nov 17;23(22):14208. doi: 10.3390/ijms232214208 (PMC9694417; doi:10.3390/ijms232214208)
Supplement: Supplementary file 1 [file ijms-23-14208-s001.zip › Table S3 KEGG pathway of DEGs in AZ.xlsx]

## Sheet: Sheet1
Table S3. KEGG pathway of DEGs in AZ treated by TDZ.
		Description	Gene_DE	q_value
Down-regulated genes	Only at N-24 h	Plant hormone signal transduction	93	0.00140675
		Glycerophospholipid metabolism	34	0.0420332
		Phagosome	31	0.0279508
		Homologous recombination	28	2.78018e-05
		DNA replication	26	0.00046397
		AGE-RAGE signaling pathway in diabetic complications	19	2.78018e-05
		Ether lipid metabolism	16	0.0420332
		Mismatch repair	15	0.0420332
	Overlapped at N-24 h and L-144 h	Plant hormone signal transduction	127	2.391e-16
		Photosynthesis	45	2.86852e-23
		Starch and sucrose metabolism	39	0.000132975
		Glyoxylate and dicarboxylate metabolism	23	0.0072426
		Photosynthesis - antenna proteins	21	1.55922e-15
		Porphyrin and chlorophyll metabolism	21	3.70112e-05
		Cutin, suberine and wax biosynthesis	20	0.0273353
		Carbon fixation in photosynthetic organisms	20	0.0305727
		Galactose metabolism	17	0.0305727
		Pentose phosphate pathway	16	0.0305727
		Fatty acid elongation	15	0.0368421
		ABC transporters	13	0.00795027
		Arginine biosynthesis	13	0.0368421
		Nitrogen metabolism	12	0.0458263
	Only at L-144 h	Starch and sucrose metabolism	20	0.00150714
		Circadian rhythm - plant	10	0.0201478
		Valine, leucine and isoleucine degradation	10	0.0456769
	Overlapped at three time points	Starch and sucrose metabolism	9	0.000175515
		Phenylpropanoid biosynthesis	9	0.00156161
Up-regulated genes	Only at N-24 h	Carbon metabolism	45	0.000173703
		Biosynthesis of amino acids	36	0.00718012
		Phenylpropanoid biosynthesis	24	0.0493821
		Glycolysis / Gluconeogenesis	23	0.00430199
		Cysteine and methionine metabolism	16	0.041335
		Citrate cycle (TCA cycle)	15	0.00148195
		Pentose phosphate pathway	14	0.000762556
		Phenylalanine metabolism	13	4.28167e-05
		Ubiquinone and other terpenoid-quinone biosynthesis	12	0.00221866
		Stilbenoid, diarylheptanoid and gingerol biosynthesis	8	0.000440913
		Flavonoid biosynthesis	8	0.00419666
	Overlapped at N-24 h and L-144 h	Plant-pathogen interaction	50	0.000110783
		MAPK signaling pathway - plant	42	3.9558e-07
		Biosynthesis of amino acids	40	0.014907
		Phenylpropanoid biosynthesis	32	0.00332505
		Glutathione metabolism	23	0.000316975
		Peroxisome	22	0.0261177
		Cysteine and methionine metabolism	18	0.0380548
		Nicotinate and nicotinamide metabolism	11	0.00173621
		Sphingolipid metabolism	11	0.0052316
		Arachidonic acid metabolism	11	0.014907
		Lysine biosynthesis	8	0.0136866
		Glycosphingolipid biosynthesis - lacto and neolacto series	3	0.0380548
	Only at L-144 h	Ribosome	46	0.000781381
		Plant-pathogen interaction	40	2.91967e-05
		MAPK signaling pathway - plant	28	0.000111446
	Overlapped at three time points	Plant hormone signal transduction	20	0.00241348
		Cysteine and methionine metabolism	9	0.00367017
		Zeatin biosynthesis	8	1.92177e-06
		Carotenoid biosynthesis	5	0.0249747
