# Supplementary material for: Low Temperature Inhibits the Defoliation Efficiency of Thidiazuron in Cotton by Regulating Plant Hormone Synthesis and the Signaling Pathway
Source: Int J Mol Sci. 2022 Nov 17;23(22):14208. doi: 10.3390/ijms232214208 (PMC9694417; doi:10.3390/ijms232214208)
Supplement: Supplementary file 1 [file ijms-23-14208-s001.zip › Table S4 The down-regulated auxin signaling genes induced by TDZ.xlsx]

## Sheet: Sheet1
Table S4. The down-regulated auxin signaling genes induced by TDZ.
	Gene	N-24 h	L-24 h	L-144 h	Description	Class
Down-regulated genes at three time points	Gh_A03G1429	-4.86478	-1.88304	-4.06145	Indole-3-acetic acid-amido synthetase GH3.6	GH3
	Gh_D01G0557	-5.27104	-1.3972	-4.04271	Indole-3-acetic acid-amido synthetase GH3.6	GH3
Down-regulated genes at N-24 h and L-144 h	Gh_D11G1233	-2.01794	0.111649	-1.03325	Auxin response factor 1	ARF
	Gh_A05G1337	-2.36029	-0.23043	-1.73053	Auxin response factor 3	ARF
	Gh_D05G1506	-2.55974	-0.612609	-1.99521	Auxin response factor 3	ARF
	Gh_A10G0266	-1.96561	-0.466984	-1.83722	Auxin response factor 3	ARF
	Gh_D06G2010	-6.11849	0.467793	-3.28118	Auxin-induced protein AUX22	AUX_IAA
	Gh_A11G1164	-4.07125	0.319721	-2.25834	Auxin-induced protein AUX28	AUX_IAA
	Gh_D07G2125	-4.02589	-0.257314	-2.09847	Auxin-induced protein AUX28	AUX_IAA
	Gh_A11G1231	-1.49676	-0.582706	-2.1618	Auxin-responsive protein IAA11	AUX_IAA
	Gh_D08G2060	-1.13366	0.412818	-1.15283	Auxin-responsive protein IAA11	AUX_IAA
	Gh_D11G1377	-2.09641	-0.0526975	-2.53787	Auxin-responsive protein IAA11	AUX_IAA
	Gh_D10G1600	-2.56738	-0.228297	-1.53292	Auxin-responsive protein IAA13	AUX_IAA
	Gh_A09G1947	-3.54741	-0.374652	-1.03226	Auxin-responsive protein IAA14	AUX_IAA
	Gh_D09G2153	-4.00526	-0.2342	-1.16238	Auxin-responsive protein IAA14	AUX_IAA
	Gh_A11G2241	-2.41304	0.198897	-1.11944	Auxin-responsive protein IAA16	AUX_IAA
	Gh_A08G2136	-2.3714	-0.146149	-1.25143	Auxin-responsive protein IAA16	AUX_IAA
	Gh_A13G1489	-2.91361	-0.579421	-2.3486	Auxin-responsive protein IAA16	AUX_IAA
	Gh_D13G1818	-3.58564	-0.596057	-2.42689	Auxin-responsive protein IAA16	AUX_IAA
	Gh_D11G2552	-3.35356	0.144713	-1.89889	Auxin-responsive protein IAA16	AUX_IAA
	Gh_D05G0472	-2.77097	-0.647575	-1.44197	Auxin-responsive protein IAA18	AUX_IAA
	Gh_A10G0575	-3.579	-0.462729	-1.84236	Auxin-responsive protein IAA26	AUX_IAA
	Gh_D05G1269	-1.58301	0.471146	-1.41378	Auxin-responsive protein IAA26	AUX_IAA
	Gh_D05G0249	-2.48933	0.405033	-1.65536	Auxin-responsive protein IAA27	AUX_IAA
	Gh_A05G3954	-3.02348	0.0909055	-1.28181	Auxin-responsive protein IAA27	AUX_IAA
	Gh_A05G1076	-1.38358	0.219945	-1.34935	Auxin-responsive protein IAA27	AUX_IAA
	Gh_A05G0429	-2.66091	1.28157	-2.12841	Auxin-responsive protein IAA29	AUX_IAA
	Gh_A05G0079	-2.62294	0.382951	-1.69036	Auxin-responsive protein IAA29	AUX_IAA
	Gh_D05G0568	-2.62614	1.45269	-1.69036	Auxin-responsive protein IAA29	AUX_IAA
	Gh_D08G1355	-2.43852	-0.280669	-6.79697	Auxin-responsive protein IAA30	AUX_IAA
	Gh_D10G1512	-1.92394	0.889256	-2.59803	Auxin-responsive protein IAA4	AUX_IAA
	Gh_A05G0356	-2.02769	-0.192636	-1.52369	Auxin-responsive protein IAA7	AUX_IAA
	Gh_D05G3823	-2.495	-0.017058	-1.26612	Auxin-responsive protein IAA8	AUX_IAA
	Gh_D07G0374	-1.01109	0.433577	-1.20317	Auxin-responsive protein IAA9	AUX_IAA
	Gh_A10G0797	-3.1441	-0.24094	-1.89021	Auxin-responsive protein IAA9	AUX_IAA
	Gh_A05G3764	-3.48259	-0.0302054	-1.37448	Auxin-responsive protein IAA9	AUX_IAA
	Gh_A06G0239	-3.15579	-0.513623	-2.31407	Auxin-responsive protein IAA9	AUX_IAA
	Gh_D06G2318	-4.00054	-0.423376	-2.66702	Auxin-responsive protein IAA9	AUX_IAA
	Gh_D10G0965	-2.21391	-0.352964	-1.46935	Auxin-responsive protein IAA9	AUX_IAA
	Gh_D11G1209	-3.02348	-0.673481	-1.011	Putative indole-3-acetic acid-amido synthetase GH3.9	GH3
	Gh_A11G1054	-3.91443	-0.570942	-1.21121	Putative indole-3-acetic acid-amido synthetase GH3.9	GH3
	Gh_A04G0281	-2.03798	-0.275374	-1.88125	Indole-3-acetic acid-amido synthetase GH3.17	GH3
	Gh_D04G0261	-1.88918	0.0726546	-1.34359	Indole-3-acetic acid-amido synthetase GH3.17	GH3
	Gh_A01G0547	-2.986	-0.489802	-3.86107	Indole-3-acetic acid-amido synthetase GH3.6	GH3
	Gh_D01G0559	-3.79951	0.350161	-4.04706	Indole-3-acetic acid-amido synthetase GH3.6	GH3
	Gh_A01G0546	-3.49313	-0.715884	-3.67185	Indole-3-acetic acid-amido synthetase GH3.6	GH3
	Gh_A13G0392	-4.79215	0.374683	-2.03325	Probable indole-3-acetic acid-amido synthetase GH3.1	GH3
	Gh_A01G0776	-5.80775	-0.981461	-1.47382	4-substituted benzoates-glutamate ligase GH3.12	GH3
	Gh_D04G0646	-3.17548	0.635211	-1.79878	Auxin transporter-like protein 2	LAX
	Gh_A01G1955	-3.81898	-0.448969	-2.5814	Auxin transporter-like protein 2	LAX
	Gh_A09G1530	-2.04474	0.232194	-1.31215	Auxin transporter-like protein 2	LAX
	Gh_D10G2366	-1.98848	-0.108702	-1.35518	Auxin transporter-like protein 2	LAX
	Gh_A10G2096	-2.04881	-0.296694	-2.18768	Auxin transporter-like protein 2	LAX
	Gh_D01G2215	-3.74704	-0.141132	-2.51502	Auxin transporter-like protein 2	LAX
	Gh_D06G0382	-1.22624	0.448245	-1.60614	Auxin transporter-like protein 3	LAX
	Gh_A06G0351	-2.11601	-0.402924	-3.22088	Auxin transporter-like protein 3	LAX
	Gh_A03G1804	-2.89308	-0.0327412	-2.92077	Auxin transporter-like protein 5	LAX
	Gh_D02G2237	-2.17548	0.0731746	-2.35518	Auxin transporter-like protein 5	LAX
	Gh_A01G1374	-2.13426	0.120262	-1.97185	Auxin transporter-like protein 5	LAX
	Gh_D01G1617	-2.83337	-0.309058	-2.75957	Auxin transporter-like protein 5	LAX
	Gh_A08G1014	-1.49958	-0.361696	-1.6692	Protein TRANSPORT INHIBITOR RESPONSE 1	TIR1
	Gh_A08G0662	-1.09009	-0.436027	-1.60524	Protein TRANSPORT INHIBITOR RESPONSE 1	TIR1
	Gh_D10G0187	-4.64276	-0.742977	-5.51796	Protein TRANSPORT INHIBITOR RESPONSE 1	TIR1
	Gh_D08G0763	-1.42607	-0.0558919	-2.32971	Protein TRANSPORT INHIBITOR RESPONSE 1	TIR1
	Gh_A11G1077	-2.49129	-0.0948021	-2.93809	Protein TRANSPORT INHIBITOR RESPONSE 1	TIR1
	Gh_D08G1288	-1.31631	-0.198823	-1.01122	Protein TRANSPORT INHIBITOR RESPONSE 1	TIR1
	Gh_D11G1228	-2.4836	-0.688679	-2.17075	Protein TRANSPORT INHIBITOR RESPONSE 1	TIR1
Down-regulated genes only at N-24 h	Gh_A06G2038	-2.37381	-0.12539	-0.469349	Auxin response factor 3	ARF
	Gh_D06G1415	-1.74337	0.111649	-0.809353	Auxin response factor 3	ARF
	Gh_Sca006585G01	-3.18867	0.108663	-0.890795	Auxin-induced protein AUX28	AUX_IAA
	Gh_D05G0138	-2.22279	1.37468	-0.643303	Auxin-responsive protein IAA29	AUX_IAA
	Gh_A09G1997	-3.52193	1.46237	-0.419308	Auxin-responsive protein IAA13	AUX_IAA
	Gh_A02G1156	-1.50563	0.158954	0.0256442	Auxin-responsive protein IAA27	AUX_IAA
	Gh_A08G1074	-2.43852	0.111649	-0.711321	Auxin-responsive protein IAA20	AUX_IAA
	Gh_A07G0317	-1.37711	-0.258995	1.12902	Auxin-responsive protein IAA9	AUX_IAA
	Gh_D10G0616	-2.44394	0.346515	-0.777447	Auxin-responsive protein IAA26	AUX_IAA
	Gh_A02G0341	-4.47414	-0.240375	-0.773863	Auxin-responsive protein IAA14	AUX_IAA
	Gh_D09G2198	-4.76044	0.799705	-0.978108	Auxin-responsive protein IAA13	AUX_IAA
	Gh_A05G1068	-2.47479	0.939361	1.78233	Auxin-induced protein AUX22	AUX_IAA
	Gh_A05G1067	-2.82082	0.178953	0.954637	Auxin-responsive protein IAA16	AUX_IAA
	Gh_D06G0506	-1.97693	0.902195	-0.466903	Auxin-responsive protein IAA9	AUX_IAA
	Gh_D11G1320	-2.20075	0.651922	-0.670808	Auxin-induced protein AUX28	AUX_IAA
	Gh_D05G1216	-1.67987	0.403309	-0.0290919	Auxin-responsive protein IAA16	AUX_IAA
	Gh_D05G1217	-1.94236	1.23766	2.2476	Auxin-induced protein AUX22	AUX_IAA
	Gh_D08G2503	-2.52248	-0.426171	-0.741483	Auxin-responsive protein IAA16	AUX_IAA
	Gh_D02G2389	-3.97502	-0.507147	-0.801924	Auxin-responsive protein IAA14	AUX_IAA
	Gh_A10G1020	-3.60844	1.04453	-1.03325	Auxin-responsive protein IAA4	AUX_IAA
	Gh_A08G1702	-2.59652	0.581134	-0.611953	Auxin-responsive protein IAA11	AUX_IAA
	Gh_A04G0874	-2.06619	0.0959387	-0.687475	Indole-3-acetic acid-amido synthetase GH3.17	GH3
	Gh_A13G0149	-1.33759	0.919004	0.657422	Auxin transporter-like protein 2	LAX
	Gh_D13G0171	-1.74664	0.33753	0.321845	Auxin transporter-like protein 2	LAX
	Gh_D09G1548	-1.38557	-0.156779	-0.2397	Auxin transporter-like protein 2	LAX
	Gh_A08G0301	-1.14901	0.518824	-0.696214	Auxin-induced protein 10A5	SAUR
	Gh_D09G1854	-4.07078	1.919	-0.0332495	Auxin-induced protein 10A5	SAUR
	Gh_D08G0393	-5.30594	-1.05828	-1.22589	Auxin-induced protein 10A5	SAUR
