# Supplementary material for: Low Temperature Inhibits the Defoliation Efficiency of Thidiazuron in Cotton by Regulating Plant Hormone Synthesis and the Signaling Pathway
Source: Int J Mol Sci. 2022 Nov 17;23(22):14208. doi: 10.3390/ijms232214208 (PMC9694417; doi:10.3390/ijms232214208)
Supplement: Supplementary file 1 [file ijms-23-14208-s001.zip › Table S5 The up-regulated ethylene signaling genes induced by TDZ.xlsx]

## Sheet: Sheet2
Table S5. The up-regulated ethylene signaling genes induced by TDZ.
	Gene	N-24 h	L-24 h	L-144 h	Description	Class
Up-regulated genes at three time points	Gh_D07G0364	5.46342	1.23718	5.29573	EIN3-binding F-box protein 1	EBF
	Gh_A08G1686	5.12618	4.07289	11.3579	Ethylene-responsive transcription factor 1B	ERF
	Gh_D10G1537	5.43185	2.57108	12.2403	Ethylene-responsive transcription factor 1B	ERF
Up-regulated genes at N-24 h and L-144 h	Gh_D07G0280	3.46938	0	4.82027	EIN3-binding F-box protein 1	EBF
	Gh_A05G0085	1.40826	0.287277	2.51605	EIN3-binding F-box protein 1	EBF
	Gh_A07G0307	7.45842	-0.357837	5.25626	EIN3-binding F-box protein 1	EBF
	Gh_D02G0430	1.85058	1.11165	8.54418	Ethylene-responsive transcription factor 1B	ERF
	Gh_A02G0377	1.82452	0	10.0351	Ethylene-responsive transcription factor 1B	ERF
	Gh_A08G0417	6.12649	0	6.12375	Ethylene-responsive transcription factor 1B	ERF
	Gh_D11G2588	4.67001	0	3.13668	Ethylene-responsive transcription factor 1B	ERF
	Gh_D08G2044	8.26214	0	10.5778	Ethylene-responsive transcription factor 1B	ERF
	Gh_D13G1806	1.13351	0	1.14732	Ethylene-responsive transcription factor 1B	ERF
	Gh_D13G1807	11.7063	0	6.87763	Ethylene-responsive transcription factor 1B	ERF
	Gh_Sca115107G01	1.5162	0	5.8656	Ethylene-responsive transcription factor 1B	ERF
	Gh_A10G1008	6.4863	0	11.5612	Ethylene-responsive transcription factor 1B	ERF
	Gh_A07G1936	3.9538	0	6.21468	Ethylene-responsive transcription factor 1B	ERF
	Gh_D07G2491	8.05967	0	6.24957	Ethylene-responsive transcription factor 1B	ERF
	Gh_A11G2282	5.14645	0	10.0876	Ethylene-responsive transcription factor 1B	ERF
	Gh_A13G1479	9.9445	0	6.64059	Ethylene-responsive transcription factor 1B	ERF
	Gh_A11G1199	1.81387	0	5.35907	Ethylene-responsive transcription factor 1B	ERF
	Gh_A09G2213	1.14645	0.168022	2.653	Protein EIN4	ETR
	Gh_D09G2169	1.1542	0.365192	2.43027	Ethylene receptor 2	ETR
	Gh_A02G0358	2.44317	0.131594	2.83873	Ethylene receptor 2	ETR
	Gh_D02G0417	1.74638	0.205113	1.84104	Ethylene receptor 2	ETR
Up-regulated genes only at N-24 h	Gh_D06G1178	1.15418	0.620113	0.64135	ETHYLENE INSENSITIVE 3-like 3 protein	EIN
	Gh_D07G1488	4.7247	0	0	Ethylene-responsive transcription factor 1B	ERF
	Gh_A13G1480	1.25834	0	0	Ethylene-responsive transcription factor 1B	ERF
	Gh_A11G2280	6.86029	0	0	Ethylene-responsive transcription factor 1B	ERF
	Gh_D08G1798	4.5639	0	0	Ethylene-responsive transcription factor 2	ERF
	Gh_D06G0459	1.63243	-0.375229	0.670654	Serine/threonine-protein kinase CTR1	CTR
