# Supplementary material for: Low Temperature Inhibits the Defoliation Efficiency of Thidiazuron in Cotton by Regulating Plant Hormone Synthesis and the Signaling Pathway
Source: Int J Mol Sci. 2022 Nov 17;23(22):14208. doi: 10.3390/ijms232214208 (PMC9694417; doi:10.3390/ijms232214208)
Supplement: Supplementary file 1 [file ijms-23-14208-s001.zip › Table S6 The CTK signaling genes induced by TDZ.xlsx]

## Sheet: Sheet2
	Table S6. The CTK signaling genes induced by TDZ.
		Gene	N-24 h	L-24 h	L-144 h	Description	Class
	Down-regulated genes at N-24 h and L-144 h	Gh_D02G1568	-2.17548	-0.210279	-1.26645	Two-component response regulator ARR11	ARR-B
		Gh_A13G2133	-1.26859	0.0241859	-1.94752	Two-component response regulator ARR18	ARR-B
		Gh_D04G1594	-2.7976	-0.315523	-2.03325	Two-component response regulator ARR18	ARR-B
		Gh_D13G0720	-2.41427	1.02419	-2.11417	Two-component response regulator ARR18	ARR-B
		Gh_A03G1136	-2.1934	-0.761521	-1.68331	Two-component response regulator ARR11	ARR-B
		Gh_D10G1750	-1.10345	-0.180006	-1.17304	Two-component response regulator ARR2	ARR-B
		Gh_A12G0642	-1.84013	0.650572	-1.73244	Two-component response regulator ARR2	ARR-B
		Gh_A10G1504	-1.05133	0.127877	-1.42703	Two-component response regulator ARR2	ARR-B
		Gh_D03G0185	-2.66091	-0.32445	-5.35518	Two-component response regulator ARR1	ARR-B
		Gh_D12G0857	-1.17879	0.397051	-1.05343	Two-component response regulator ARR1	ARR-B
		Gh_A13G1519	-3.5099	0.834115	-2.2397	Histidine-containing phosphotransfer protein 1	AHP
		Gh_D11G2680	-3.41155	0.530733	-1.009	Histidine-containing phosphotransfer protein 5	AHP
		Gh_A11G2364	-1.47679	0.363188	-1.64432	Histidine-containing phosphotransfer protein 5	AHP
		Gh_D13G1848	-3.15612	0.867723	-3.29312	Histidine-containing phosphotransfer protein 1	AHP
		Gh_D01G1500	-2.05852	-0.993276	-1.67252	Histidine kinase 3	AHK
		Gh_D07G1665	-1.67657	-0.519472	-1.46883	Histidine kinase 2	AHK
		Gh_A07G1520	-2.1999	-0.736059	-1.50619	Histidine kinase 2	AHK
		Gh_D02G1509	-1.05199	-0.528681	-1.69669	Histidine kinase 3	AHK
		Gh_D11G1534	-3.12034	0.427676	-1.46497	Histidine kinase 2	AHK
		Gh_D10G1858	-3.31298	-0.566423	-5.03736	Two-component response regulator ARR16	ARR-A
	Down-regulated genes only at N-24 h	Gh_D05G0524	-1.5234	-0.11662	-0.0738915	Two-component response regulator ARR12	ARR-B
		Gh_D13G1951	-1.21501	-0.300249	-0.165835	Two-component response regulator ARR12	ARR-B
		Gh_A09G2069	-1.04259	-0.709381	-0.825174	Two-component response regulator ARR1	ARR-B
		Gh_D09G2246	-1.36964	-0.0940489	0.290765	Histidine-containing phosphotransfer protein 1	AHP
		Gh_A07G1748	-1.31298	-0.76282	-0.448287	Histidine-containing phosphotransfer protein 5	AHP
		Gh_A11G1389	-1.59052	0.540492	-0.603998	Histidine kinase 2	AHK
		Gh_D02G1369	-1.16859	0.41883	-0.34359	Histidine kinase 4	AHK
		Gh_A03G0984	-1.59296	0.432222	-0.719141	Histidine kinase 4	AHK
		Gh_A03G0983	-1.74784	0.794197	0.0939857	Histidine kinase 4	AHK
		Gh_A10G1613	-1.33898	0.677246	0.530651	Two-component response regulator ARR16	ARR-A
		Gh_A10G1603	-1.01841	-0.174106	-0.124397	Two-component response regulator ARR16	ARR-A
	Up-regulated genes at N-24 h and L-24 h	Gh_A10G0939	1.28762	1.16227	-0.0405175	Histidine-containing phosphotransfer protein 1	AHP
		Gh_D05G2656	2.02092	6.33485	0.551713	Two-component response regulator ARR17	ARR-A
	Up-regulated genes at three time points	Gh_A10G1654	3.5008	2.75801	4.58319	Two-component response regulator ARR9	ARR-A
		Gh_A05G3475	1.36573	2.58181	2.8111	Two-component response regulator ARR9	ARR-A
		Gh_D04G1933	1.57849	2.47558	3.68697	Two-component response regulator ARR8	ARR-A
		Gh_D04G1347	1.38447	2.6336	2.73392	Two-component response regulator ARR4	ARR-A
		Gh_D09G1609	1.31538	1.92095	2.03941	Two-component response regulator ARR6	ARR-A
		Gh_D10G1909	2.91347	1.89259	4.35415	Two-component response regulator ARR9	ARR-A
		Gh_A13G0029	5.44921	3.68839	7.04	Two-component response regulator ARR8	ARR-A
		Gh_D13G0044	5.45248	3.80254	6.85075	Two-component response regulator ARR8	ARR-A
	Up-regulated genes at N-24 h and L-144 h	Gh_A09G1290	2.82105	-0.435839	2.33598	Histidine-containing phosphotransfer protein 2	AHP
		Gh_D11G1243	1.27573	-0.136279	1.25532	Histidine-containing phosphotransfer protein 5	AHP
		Gh_D05G2240	5.95879	1.11165	2.77411	Two-component response regulator ARR9	ARR-A
		Gh_A05G3723	3.14645	0	8.00044	Two-component response regulator ARR9	ARR-A
		Gh_A07G0197	1.17393	0.314278	1.62066	Two-component response regulator ARR12	ARR-B
		Gh_Sca005214G02	1.42975	0.745521	2.08623	Two-component response regulator ARR2	ARR-B
		Gh_D07G0251	1.26539	-0.603983	1.77543	Two-component response regulator ARR12	ARR-B
	Up-regulated genes only at N-24 h	Gh_A12G0049	4.69459	0.111649	0	Histidine-containing phosphotransfer protein 5	AHP
		Gh_A05G2389	4.88502	1.69661	0	Two-component response regulator ARR17	ARR-A
		Gh_D11G1176	3.25314	0	0	Two-component response regulator ARR1	ARR-B
