# Supplementary material for: Low Temperature Inhibits the Defoliation Efficiency of Thidiazuron in Cotton by Regulating Plant Hormone Synthesis and the Signaling Pathway
Source: Int J Mol Sci. 2022 Nov 17;23(22):14208. doi: 10.3390/ijms232214208 (PMC9694417; doi:10.3390/ijms232214208)
Supplement: Supplementary file 1 [file ijms-23-14208-s001.zip › Table S7 The ABA signaling genes induced by TDZ.xlsx]

## Sheet: Sheet2
Table S7. The ABA signaling genes induced by TDZ.
	Gene	N-24 h	L-24 h	L-144 h	Description	Class
Down-regulated genes at N-24 h and L-144 h	Gh_D02G0839	-1.79697	-0.189218	-1.03325	Serine/threonine-protein kinase SAPK1	SNRK2
	Gh_A12G0641	-1.1452	-0.67507	-1.01652	Serine/threonine-protein kinase SAPK10	SNRK2
	Gh_A02G0789	-1.65106	-0.930171	-1.3634	Serine/threonine-protein kinase SAPK1	SNRK2
	Gh_D08G1399	-1.2111	-0.0851841	-1.36285	Abscisic acid receptor PYL9	PYL
	Gh_D05G3907	-2.49482	0.101688	-2.28028	Protein phosphatase 2C 3	PP2C
	Gh_A10G1998	-2.28155	-0.198108	-1.96193	Protein phosphatase 2C 37	PP2C
	Gh_A12G2380	-1.44236	-0.00382848	-1.77868	Probable protein phosphatase 2C 75	PP2C
	Gh_A05G0782	-2.22465	-0.0141908	-2.04801	Protein phosphatase 2C 3	PP2C
	Gh_A13G0184	-2.07594	-0.0809963	-3.98745	Protein phosphatase 2C 3	PP2C
	Gh_A05G0308	-1.35571	-0.430799	-1.25375	Protein phosphatase 2C 16	PP2C
	Gh_D13G0199	-1.55399	-0.625317	-1.63811	Protein phosphatase 2C 37	PP2C
	Gh_D10G2305	-1.35363	-0.121879	-1.16241	Protein phosphatase 2C 37	PP2C
	Gh_D12G2424	-2.51066	-0.963205	-3.15219	Probable protein phosphatase 2C 51	PP2C
	Gh_A13G1741	-2.32748	-0.532207	-1.44829	Protein phosphatase 2C 56	PP2C
Down-regulated genes only at N-24 h	Gh_D10G1083	-1.14083	0.845837	-0.303552	Serine/threonine-protein kinase SAPK7	SNRK2
	Gh_D03G0174	-1.56976	-0.136279	-0.518676	Serine/threonine-protein kinase SAPK8	SNRK2
	Gh_Sca020881G01	-1.61909	0.749079	0.189143	Serine/threonine-protein kinase SAPK8	SNRK2
	Gh_D07G0405	-2.17548	-0.303389	-0.355178	Serine/threonine-protein kinase SRK2G	SNRK2
	Gh_D08G1765	-1.96229	0.00132532	-0.213457	Serine/threonine-protein kinase SAPK3	SNRK2
	Gh_A12G0247	-1.09701	-0.136964	-0.740187	Serine/threonine-protein kinase SRK2B	SNRK2
	Gh_D08G1226	-1.43852	0.827856	-0.120712	Abscisic acid receptor PYL8	PYL
	Gh_D05G2920	-3.17548	-0.151386	-0.355178	Abscisic acid receptor PYL4	PYL
	Gh_D13G2089	-2.31298	0.626222	-0.296284	Protein phosphatase 2C 77	PP2C
	Gh_A06G0579	-1.20453	-0.625317	-0.53575	Protein phosphatase 2C 56	PP2C
	Gh_D05G0410	-1.40414	-0.229138	-0.856242	Protein phosphatase 2C 16	PP2C
	Gh_D02G2079	-1.08609	-0.142255	0.155196	ABSCISIC ACID-INSENSITIVE 5-like protein 6	ABF
	Gh_D02G2104	-1.64564	-0.0187479	-0.816758	Serine/threonine-protein kinase SRK2E	SNRK2
Up-regulated genes at N-24 h and L-24 h	Gh_A09G1649	2.46838	2.11165	-2.89832	Probable protein phosphatase 2C 51	PP2C
Up-regulated genes at three time points	Gh_A05G1922	4.63411	1.36541	5.01785	Serine/threonine-protein kinase SAPK1	SNRK2
	Gh_A08G2192	2.58272	1.07212	2.45716	Protein phosphatase 2C 77	PP2C
	Gh_D05G2155	1.65341	1.81947	4.55171	Serine/threonine-protein kinase SAPK1	SNRK2
Up-regulated genes at N-24 h and L-144 h	Gh_D08G2557	2.61959	0.307714	1.40361	Protein phosphatase 2C 77	PP2C
	Gh_D09G1743	2.46838	0	3.03714	Probable protein phosphatase 2C 51	PP2C
	Gh_D03G1169	3.99455	0	4.72877	Probable protein phosphatase 2C 24	PP2C
	Gh_D09G1585	2.92489	0.526686	1.84122	Abscisic acid receptor PYL4	PYL
Up-regulated genes only at N-24 h	Gh_A03G2095	1.19084	-1.12936	0.124292	ABSCISIC ACID-INSENSITIVE 5-like protein 5	ABF
	Gh_Sca006599G01	1.18709	-0.0488159	0.488703	Protein ABSCISIC ACID-INSENSITIVE 5	ABF
	Gh_A09G2421	1.16691	2.43358	-0.0332495	Abscisic acid receptor PYL4	PYL
	Gh_D08G2587	5.98782	0	0	Abscisic acid receptor PYL2	PYL
	Gh_A06G1418	1.63187	0	0	Abscisic acid receptor PYL6	PYL
