# Supplementary material for: Low Temperature Inhibits the Defoliation Efficiency of Thidiazuron in Cotton by Regulating Plant Hormone Synthesis and the Signaling Pathway
Source: Int J Mol Sci. 2022 Nov 17;23(22):14208. doi: 10.3390/ijms232214208 (PMC9694417; doi:10.3390/ijms232214208)
Supplement: Supplementary file 1 [file ijms-23-14208-s001.zip › Table S8 The up-regulated cell wall hydrolase genes induced by TDZ.xlsx]

## Sheet: Sheet2
Table S8. The up-regulated cell wall hydrolase genes induced by TDZ.
	Gene	N-24 h	L-24 h	L-144 h	Description
Up-regulated genes at three time points	Gh_D07G1240	1.4745	2.00147	2.09013	Pectinesterase
	Gh_D06G0865	1.25378	1.31328	3.3631	Pectinesterase
	Gh_D06G0866	2.82827	2.05918	4.12325	Pectinesterase
	Gh_A06G0755	1.7421	1.77957	2.84122	Pectinesterase
Up-regulated genes at N-24h and L-24h	Gh_A01G1305	1.8057	1.25251	0.870288	Cellulase
	Gh_D01G0666	3.60588	4.67643	0	Cellulase
	Gh_A11G2794	3.86874	2.80399	0.703716	Polygalacturonase
	Gh_A05G1180	1.23218	1.32639	0.183144	Pectinesterase
Up-regulated genes at N-24h and L-144h	Gh_A05G1967	2.40279	-0.347783	3.12325	Cellulase
	Gh_D01G1563	1.33087	0.111649	1.30555	Cellulase
	Gh_D03G0779	1.92568	0.986118	5.14997	Cellulase
	Gh_D11G1785	1.0705	0.559108	2.46318	Cellulase
	Gh_D07G1803	6.36807	-1.28478	6.91786	Polygalacturonase
	Gh_A07G1598	5.9591	0	6.43029	Polygalacturonase
	Gh_A05G3328	1.02092	0.642163	2.55171	Polygalacturonase
	Gh_A03G1207	1.25436	0.326153	1.66017	Polygalacturonase
	Gh_A03G1208	2.10005	0.990342	2.56483	Polygalacturonase
	Gh_A11G2966	1.03455	0.71572	1.04357	Polygalacturonase
	Gh_A07G2033	3.47354	0	4.7509	Polygalacturonase
	Gh_D02G1642	3.0127	0.474219	3.11875	Polygalacturonase
	Gh_D02G1641	1.13118	-0.325757	1.61445	Polygalacturonase
	Gh_A09G1182	2.07498	0.583717	2.6083	Polygalacturonase
	Gh_A07G1298	2.45226	1.33404	6.03267	Polygalacturonase
	Gh_D12G1297	4.71973	-2.97581	5.21889	Pectinesterase
	Gh_A12G1177	4.7903	-4.13628	5.44248	Pectinesterase
	Gh_A07G0152	1.38248	0.473226	2.51929	Pectinesterase
	Gh_D05G0373	1.33333	-0.540428	2.73934	Pectinesterase
	Gh_A05G0272	4.19084	-0.134127	3.96675	Pectinesterase
	Gh_A06G1279	4.39437	0.111649	5.74811	Pectinesterase
Up-regulated genes only at N-24h	Gh_A11G0727	3.84689	0.597076	1.38179	Pectinesterase
	Gh_D05G2464	5.52727	0	3.1322	Pectinesterase
	Gh_D05G2465	3.46982	1.08314	1.14514	Pectinesterase
	Gh_A07G2270	1.58296	-0.110744	0.993972	Pectinesterase
	Gh_A09G2081	2.97268	0	0	Pectinesterase
	Gh_D11G0846	3.31637	-0.473314	-2.61821	Pectinesterase
	Gh_Sca064675G01	3.60588	0.111649	1.96675	Pectinesterase
	Gh_D09G1161	1.38972	-1.78742	-1.90772	Polygalacturonase
