# Supplementary material for: Low Temperature Inhibits the Defoliation Efficiency of Thidiazuron in Cotton by Regulating Plant Hormone Synthesis and the Signaling Pathway
Source: Int J Mol Sci. 2022 Nov 17;23(22):14208. doi: 10.3390/ijms232214208 (PMC9694417; doi:10.3390/ijms232214208)
Supplement: Supplementary file 1 [file ijms-23-14208-s001.zip › Table S9 List of primers used in this study.xlsx]

## Sheet: Sheet1
Table S9. List of primers used in this study.
Gene ID		Prime sequence (5’-3’)
Gh_A03G1429	F	TTCGCTTCTGGTTTCATTCG
	R	CCTTTGCTACATTCTGCCTCA
Gh_D01G0557	F	TTCCCACCCGATTTCTGA
	R	GTGACCTCCTCCCTAACTCC
Gh_A11G1164	F	AGGGGTGAAGATGGGGATGA
	R	CAGGTGGAGGCTTAGCAGGA
Gh_A05G3764	F	ATGGCAACGTAAGTACGAATC
	R	AGTCCCAAGTTTGACGAAGG
Gh_D09G2198	F	GAGTCAGCAATGTCAGAGGC
	R	AAACGGTAACTGAAGGAGGAG
Gh_A02G0341	F	GTGACGAAATTAGTGACAGAGC
	R	GCATCGGATAACTTTTGGTAG
Gh_D07G1488	F	CGACATTCTACACCCCAAAA
	R	GGTCGCTTCCTAACACCTCTA
Gh_A11G2280	F	GAAGTCAACTCCGAGCCTGTC
	R	AGCCAAACTCTAACACCATTCC
Gh_D08G2044	F	CTCGCCTGAGTCGTCATTTT
	R	GCCTCTTCCTTACCCCTCTAT
Gh_Sca115107G01	F	GAATGGGGTAAGGGTATGGC
	R	AACCTCCGTCCTCCTGATTG
Gh_D07G0364	F	GAGTTCGTATTAGTGCCCCATT
	R	TGATGACCCGTATTCACCCT
Gh_D10G1537	F	AAAGGGTAGTCCGACGAAAG
	R	CACAGGAAAGTTGAGTATGGC
Gh_D11G0846	F	ATGATGGTGGGCGATGGTAT
	R	CGTAGAGCCACTGCCTGATG
Gh_D09G1161	F	CACATCAGCACCATCAACTAA
	R	CTCAAGCACAACTTCACCCT
Gh_A05G1967	F	TGGAGGAAGTATCATAGTTGCC
	R	AATCCCATTCTCGTCCGTGTC
Gh_A03G1208	F	TTCAACTCCTTCACCCCACG
	R	AATTCGGCTGGAACGACAAC
Gh_A07G0152	F	GTCCTAATTCCAAGTCCAACG
	R	CATCTGCTGCCACCACAAC
Actin (AY305733)	F	ATCCTCCGTCTTGACCTTG
	R	TGTCCGTCAGGCAACTCAT
