# Supplementary figures and images for: Low Temperature Inhibits the Defoliation Efficiency of Thidiazuron in Cotton by Regulating Plant Hormone Synthesis and the Signaling Pathway
Source: MDPI journal article supplement (doi:10.3390/ijms232214208), 2022-11-17

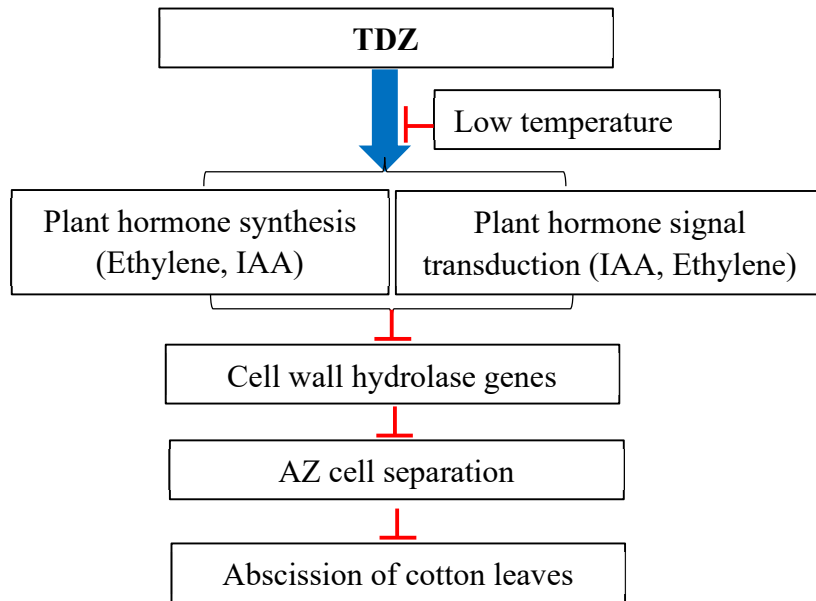

**Figure S1.** The pathway of low temperature inhibited the defoliation efficiency of TDZ in cotton.

Supplement: s1 [file s1]
